# Supplementary material for: Synthesis of substituted γ- and δ-lactams based on titanocene(iii)-catalysed radical cyclisations of trichloroacetamides
Source: Royal Society of Chemistry journal article supplement (doi:10.1039/c6ra12180b), 2016-01-01

**SUPPORTING INFORMATION FOR:**

**Synthesis of substituted  $\gamma$  and  $\delta$ -lactams based on titanocene(III)-catalyzed radical cyclizations of trichloroacetamides**

Faïza Diaba,<sup>a</sup> Enrique Gómez-Bengoa,<sup>b</sup> Juan M. Cuerva,<sup>c</sup> Josep Bonjoch,<sup>a,\*</sup> José Justicia<sup>c,\*</sup>

<sup>a</sup> Laboratori de Química Orgànica, Facultat de Farmàcia, IBUB, Universitat de Barcelona, Av. Joan XXIII s/n, 08028-Barcelona, Spain. <sup>b</sup> Departamento de Química Orgánica I, Universidad del País Vasco, Manuel Lardizábal 3, 20018 San Sebastián, Spain. <sup>c</sup> Departamento de Química Orgánica, Facultad de Ciencias, Universidad de Granada, C. U. Fuentenueva s/n, 18071-Granada, Spain.

E-Mail: josep.bonjoch@ub.edu; jjusti@ugr.es

---

**Contents**

|                                                                    |         |
|--------------------------------------------------------------------|---------|
| - Experimental section                                             | S2-S10  |
| - Computational details                                            | S10-S28 |
| - References                                                       | S28-S29 |
| - <sup>1</sup> H and <sup>13</sup> C NMR spectra for new compounds | S30-S45 |

## Experimental Section

**General Details.** Deoxygenated solvent and reagents were used for all reactions involving  $\text{Cp}_2\text{TiCl}$ . THF was freshly distilled from Na. Drying of organic extracts was performed over anhydrous  $\text{Na}_2\text{SO}_4$ .  $\text{Me}_3\text{SiCl}$  was purchased from Aldrich, and stored at  $-4\text{ }^\circ\text{C}$ . All product mixtures were analyzed by thin-layer chromatography using TLC silica gel plates with a fluorescent indicator ( $\lambda = 254\text{ nm}$ ). Analytical thin-layer chromatography was performed on  $\text{SiO}_2$  (silica gel 60 F<sub>254</sub>), and the spots were located by UV light or/and a 1%  $\text{KMnO}_4$  aqueous solution, or phosphomolybdic acid etanolic solution. Products were purified by flash chromatography on silica gel 60 (240-400 mesh). Yields refer to analytically pure samples. Chemical shifts of  $^1\text{H}$  and  $^{13}\text{C}$  NMR spectra are reported in ppm downfield ( $\delta$ ) from  $\text{Me}_4\text{Si}$ . Spectroscopic data for compounds **1**, <sup>1</sup>**4**, <sup>2</sup>**6**, <sup>1</sup>**7**, <sup>3</sup>**8**, <sup>1</sup> and **14**<sup>4</sup> matched with previously described.

**General procedure for preparation of new trichloroacetamides 9-13 and 15:** To a solution of the corresponding amine (1 mmol) in  $\text{CH}_2\text{Cl}_2$  (15 mL), DMAP (1.5 mmol),  $\text{Et}_3\text{N}$  (1.5 mmol), and trichloroacetyl chloride (1.2 mmol) were added, and the mixture was stirred at room temperature for 3 h. Then,  $\text{Et}_2\text{O}$  was added, and the solution was washed with 2N HCl, dried, and the solvent removed. Compounds **1** and **6-15** were isolated by flash chromatography of the residue (hexane/EtOAc) and characterized by spectroscopic techniques.

**Compound 9:** Following the general procedure from (*E*, *Z*)-4-(benzylamino)but-2-en-1-yl ethyl carbonate and after chromatography (hexane/EtOAc 85:15), trichloroacetamide **9** (mixture of isomers) was isolated in 42% yield as a colorless oil.  $^1\text{H}$  NMR ( $\text{CDCl}_3$ , 300 MHz):  $\delta$  7.41-7.13 (m, 5H), 5.88-5.60 (m, 2H), 5.00-4.88 (m, 1H), 4.70-4.54 (m, 2H), 4.18 (q,  $J = 7.1\text{ Hz}$ , 2H), 3.98-3.88 (m, 1H), 1.29 (t,  $J = 7.1\text{ Hz}$ , 3H).  $^{13}\text{C}$  NMR

(CDCl<sub>3</sub>, 75 MHz):  $\delta$  169.7 (C), 160.9 (C), 155.0 (C), 129.0 (CH), 128.1 (CH), 128.0 (CH), 104.8 (CH), 67.0 (CH<sub>2</sub>), 64.3 (CH<sub>2</sub>), 14.4 (CH<sub>3</sub>). HRMS (ESI-TOF): calcd for [C<sub>16</sub>H<sub>22</sub>Cl<sub>3</sub>N<sub>2</sub>O<sub>4</sub>] (M+NH<sub>4</sub>)<sup>+</sup> 411.0640, found 411.0632.

Compound **10**: Following the general procedure from *N*-benzyloct-2-yn-1-amine and after chromatography (hexane/EtOAc 9:1), trichloroacetamide **10** was isolated in 61% yield as a yellowish oil. <sup>1</sup>H NMR (CDCl<sub>3</sub>, 300 MHz):  $\delta$  7.47-7.18 (m, 5H), 5.19–4.72 (m, 2H), 4.50-4.10 (m, 2H), 2.34–2.05 (m, 2H), 1.53 (q, *J* = 6.9 Hz, 2H), 1.48–1.28 (m, 4H), 0.94 (t, *J* = 6.9 Hz, 3H). <sup>13</sup>C NMR (CDCl<sub>3</sub>, 75 MHz):  $\delta$  172.8 (C), 160.4 (C), 128.9 (CH), 128.0 (CH), 93.0 (C), 86.3 (C), 73.3 (C), 65.7 (CH<sub>2</sub>), 31.1 (CH<sub>2</sub>), 28.3 (CH<sub>2</sub>), 22.3 (CH<sub>2</sub>), 18.7 (CH<sub>2</sub>), 14.1 (CH<sub>3</sub>). HRMS (ESI-TOF): calcd for [C<sub>17</sub>H<sub>21</sub>Cl<sub>3</sub>NO] (M+H)<sup>+</sup> 360.0683, found 360.0682.

Compound **11**: Following the general procedure from *N*-allyl-1-phenylbut-3-en-1-amine,<sup>5</sup> but without DMAP and only 2 h of reaction time, and after chromatography (hexane/CH<sub>2</sub>Cl<sub>2</sub> 1:1), trichloroacetamide **11** was isolated in 82% yield as a yellowish oil. <sup>1</sup>H NMR (CDCl<sub>3</sub>, 400 MHz, rotamer mixture):  $\delta$  7.52-7.26 (m, 5H), 5.94-5.74 (m, 2H), 5.22-5.00 (m, 5H), 4.40 and 4.10 (2 m, 1H, major), 3.94 and 3.62 (2 m, 1H, minor), 3.05 (br s, 1H), 2.92 (br s, 1H). <sup>13</sup>C NMR (CDCl<sub>3</sub>, 100 MHz, two rotamers):  $\delta$  160.3 (C), 138.1 (C, major), 137.2 (C, minor), 134.4 (CH, major), 133.8 (CH, minor), 133.2 (CH, minor), 132.5 (CH, major), 128.5 (CH), 128.2 (CH), 127.8 (CH), 118.6 (CH<sub>2</sub>, minor), 118.0 (CH<sub>2</sub>, major), 93.7 (C), 62.2 (CH, major), 60.5 (CH, minor), 51.8 (CH<sub>2</sub>, major), 49.1 (CH<sub>2</sub>, minor), 36.5 (CH<sub>2</sub>, minor), 35.4 (CH<sub>2</sub>, major). HRMS (ESI-TOF): calcd for [C<sub>15</sub>H<sub>17</sub>Cl<sub>3</sub>NO] (M+H)<sup>+</sup> 332.0370, found 332.0370.

Compound **12**: Following the general procedure from *N*-benzyl-1-(4-(prop-1-en-2-yl)cyclohex-1-en-1-yl)methanamine,<sup>6</sup> and after chromatography (hexane/EtOAc 9:1), trichloroacetamide **12** was isolated in 87% yield as a yellowish oil. <sup>1</sup>H NMR (CDCl<sub>3</sub>,

400 MHz):  $\delta$  7.47–6.98 (m, 5H), 5.61 (brs, 1H), 5.43 (brs, 1H), 5.01–4.83 (m, 1H), 4.78–4.64 (m, 2H), 4.12–3.83 (m, 2H), 2.15 (t,  $J = 10.1$  Hz, 2H), 2.05–1.91 (m, 3H), 1.87–1.77 (m, 1H), 1.74 (s, 3H), 1.63–1.49 (m, 1H).  $^{13}\text{C}$  NMR ( $\text{CDCl}_3$ , 75 MHz):  $\delta$  174.1 (C), 161.5 (C), 131.6 (C), 129.0 (CH), 128.2 (CH), 128.0 (CH), 127.3 (CH), 109.2 ( $\text{CH}_2$ ), 105.0 (C), 93.6 (C), 65.8 ( $\text{CH}_2$ ), 41.1 (CH), 30.7 ( $\text{CH}_2$ ), 27.5 ( $\text{CH}_2$ ), 26.7 ( $\text{CH}_2$ ), 21.1 ( $\text{CH}_3$ ). HRMS (ESI-TOF): calcd for  $[\text{C}_{19}\text{H}_{23}\text{Cl}_3\text{NO}] (\text{M}+\text{H})^+$  386.0840, found 386.0834.

Compound **13**: Following the general procedure from *N*-benzyl-4-butenylamine,<sup>7</sup> and after chromatography (hexane/EtOAc 95:5), trichloroacetamide **13** was isolated in 87% yield as a 1:1.5 mixture of rotamers: Colorless oil.  $^1\text{H}$  NMR ( $\text{CDCl}_3$ , 400 MHz):  $\delta$  7.45–7.18 (m), 5.81–5.62 (m), 5.14–4.91 (m), 4.72 (br s), 3.77–3.62 (m), 3.47–3.28 (m, 2H), 2.57–2.26 (m).  $^{13}\text{C}$  NMR ( $\text{CDCl}_3$ , 75 MHz):  $\delta$  160.8 (2C), 135.4 (C), 134.5 (C), 128.9 (CH), 127.9 (CH), 127.6 (CH), 127.2 (CH), 117.7 ( $\text{CH}_2$ ), 117.7 ( $\text{CH}_2$ ), 93.4 (C), 53.4 ( $\text{CH}_2$ ), 50.9 ( $\text{CH}_2$ ), 48.1 ( $\text{CH}_2$ ), 47.4 ( $\text{CH}_2$ ), 32.1 ( $\text{CH}_2$ ), 30.9 ( $\text{CH}_2$ ). HRMS (ESI-TOF): calcd for  $[\text{C}_{13}\text{H}_{14}\text{Cl}_3\text{NO}] (\text{M}+\text{H})^+$ , found 305.0155.

Compound **15**: Following the general procedure from *N*-benzyl-4-methylcyclohex-3-enamine,<sup>8</sup> but without DMAP and 2 h of reaction time, and after chromatography (hexane/ $\text{CH}_2\text{Cl}_2$  1:1), trichloroacetamide **15** was isolated in 97% yield as a white solid. mp 76–77 °C.  $^1\text{H}$  NMR ( $\text{CDCl}_3$ , 400 MHz):  $\delta$  7.34–7.16 (m, 5H), 5.27 (br s, 1H), 4.73 (br s, 1H), 4.66 (d,  $J = 16$  Hz, 1H), 4.54 (d,  $J = 16$  Hz, 1H), 2.30–2.10 (m, 3H), 2.06–1.88 (m, 2H), 1.81 (m, 1H), 1.64 (s, 3H).  $^{13}\text{C}$  NMR ( $\text{CDCl}_3$ , 100 MHz):  $\delta$  160.8 (C), 137.5 (C), 133.9 (C), 128.5 (CH), 126.9 (CH), 126.1 (CH), 118.7 (CH), 93.7 (C), 56.1 (CH), 47.7 ( $\text{CH}_2$ ), 30.1 ( $\text{CH}_2$ ), 29.0 ( $\text{CH}_2$ ), 27.3 ( $\text{CH}_2$ ), 23.1 ( $\text{CH}_3$ ). HRMS (ESI-TOF): calcd for  $[\text{C}_{16}\text{H}_{19}\text{Cl}_3\text{NO}] (\text{M}+\text{H})^+$  346.0527, found 346.0526.

**Cp<sub>2</sub>TiCl-mediated cyclization of 1:** Strictly deoxygenated THF (20 mL, passing Ar for 15 min) was added to a mixture of Cp<sub>2</sub>TiCl<sub>2</sub> (348 mg, 1.4mmol) and Mn dust (204 mg, 3.7mmol) under an Ar atmosphere, and the suspension was stirred at room temperature until it turned lime green (after about 15 min). Then, a solution of trichloroacetamide **1** (150 mg, 0.47 mmol) in THF (2 mL) was added, and the mixture was stirred for 24 h. The reaction was then quenched with 2N HCl, and extracted with EtOAc. The organic layer was washed with brine, dried, and the solvent removed. The residue was purified by flash chromatography (hexane/EtOAc 6:4) to yield **2** (23 mg, 24%), and **3**<sup>9</sup> (18 mg, 16%).

Compound **2**: Brown oil. <sup>1</sup>H NMR (CDCl<sub>3</sub>, 300 MHz): δ 7.34-7.22 (m, 5H), 4.45 (s, 2H), 2.97 (s, 2H), 2.29 (s, 2H), 1.10 (s, 6H). <sup>13</sup>C NMR (CDCl<sub>3</sub>, 75 MHz): δ 174.3 (C), 136.5 (C), 128.7 (CH), 128.2 (CH), 127.6 (CH), 59.7 (CH<sub>2</sub>), 46.5 (CH<sub>2</sub>), 46.3 (CH<sub>2</sub>), 32.6 (C), 27.8 (CH<sub>3</sub>). HRMS (ESI-TOF): calcd for [C<sub>13</sub>H<sub>18</sub>NO] (M+H)<sup>+</sup> 204.1383, found 204.1392.

**General procedure for Ti(III)-catalyzed cyclizations of 1, 6-15:** Strictly deoxygenated THF (20 mL, passing Ar for 15 min) was added to a mixture of Cp<sub>2</sub>TiCl<sub>2</sub> (0.2, 0.4, 0.6 or 0.8 mmol, see Table 1 and SI) and Mn dust (8 mmol) under an Ar atmosphere, and the suspension was stirred at room temperature until it turned lime green (after about 15 min). Then, a solution of the corresponding trichloroacetamide **1, 6-15** (1 mmol), 2,4,6-collidine (6 mmol) in THF (2 mL), and Me<sub>3</sub>SiCl (4 mmol) were added and the mixture was stirred for 72 h. The reaction was then quenched with 2N HCl, and extracted with EtOAc. The organic layer was washed with brine, dried, and the solvent removed. Products **2-3** and **16-27** were isolated by flash chromatography of

the residue (hexane/EtOAc) and characterized by spectroscopic techniques. Results are depicted in Tables 1 and 2.

Compound **16**: Isolated with hexane/EtOAc 6:4.<sup>10</sup>

Compound **18**: Isolated with hexane/EtOAc 6:4.<sup>11</sup>

Compound **19**: Isolated with hexane/EtOAc 6:4 as a 1:1 mixture with **19r**. Yellowish oil. <sup>1</sup>H NMR (CDCl<sub>3</sub>, 300 MHz): δ 7.42–7.09 (m, 5H), 4.77 (brs, 1H), 4.73 (brs, 1H), 4.56–4.23 (m, 2H), 3.38 (t, *J* = 8.9 Hz, 1H), 3.10 (t, *J* = 8.9 Hz, 1H), 2.62–2.42 (m, 2H), 2.24–1.96 (m, 2H), 1.67 (s, 3H). <sup>13</sup>C NMR (CDCl<sub>3</sub>, 75 MHz): δ 174.6 (C), 144.5 (C), 136.4 (C), 128.7 (CH), 128.1 (CH), 127.5 (CH), 111.0 (CH<sub>2</sub>), 50.8 (CH<sub>2</sub>), 38.5 (CH), 36.0 (CH<sub>2</sub>), 20.0 (CH<sub>3</sub>). HRMS (ESI-TOF): calcd for [C<sub>14</sub>H<sub>18</sub>NO] (M+H)<sup>+</sup> 216.1383, found 216.1392.

Compound **19r**: Isolated with hexane/EtOAc 6:4 as a colorless oil. <sup>1</sup>H NMR (CDCl<sub>3</sub>, 300 MHz): δ 7.42–7.17 (m, 5H), 4.61–4.28 (m, 2H), 3.31 (t, *J* = 8.9 Hz, 1H), 2.97 (t, *J* = 8.9 Hz, 1H), 2.60–2.44 (m, 2H), 1.60–1.43 (m, 2H), 0.89 (d, *J* = 6.7 Hz, 3H), 0.84 (d, *J* = 6.7 Hz, 3H). <sup>13</sup>C NMR (CDCl<sub>3</sub>, 75 MHz): δ 174.0 (C), 136.7 (C), 128.7 (CH), 128.2 (CH), 127.6 (CH), 51.1 (CH<sub>2</sub>), 46.6 (CH<sub>2</sub>), 39.0 (CH), 36.2 (CH<sub>2</sub>), 32.64 (CH), 20.6 (CH<sub>3</sub>), 20.1 (CH<sub>3</sub>). HRMS (ESI-TOF): calcd for [C<sub>14</sub>H<sub>20</sub>NO] (M+H)<sup>+</sup> 218.1539, found 218.1545.

Compound **20**: Isolated with hexane/EtOAc 1:1.<sup>11</sup>

Compound **21**: Isolated with hexane/EtOAc 6:4, as a 9:1 mixture of isomers. Colorless oil. <sup>1</sup>H NMR (CDCl<sub>3</sub>, 300 MHz): δ 7.51–7.13 (m, 10H), 5.49–5.30 (m, 2H), 4.54 (s, 2H, major), 4.53 (s, 2H, minor), 3.87 (s, 2H, major), 3.76 (s, 2H, minor), 3.19 (s, 2H, major), 3.12 (s, 2H, minor), 1.97–1.81 (m, 2H), 1.42–1.18 (m, 12H), 0.90 (t, *J* = 6.9 Hz, 6H). <sup>13</sup>C NMR (CDCl<sub>3</sub>, 75 MHz): δ 173.3 (C), 136.2 (C), 128.8 (CH, major), 128.8 (CH, minor), 128.3 (CH, minor), 128.2 (CH, major), 127.7 (CH), 126.7 (CH, minor),

126.4 (CH), 125.2 (CH, major), 125.1 (CH, minor), 52.1 (CH<sub>2</sub>, minor), 50.1 (CH<sub>2</sub>, major), 46.5 (CH<sub>2</sub>, major), 46.4 (CH<sub>2</sub>, minor), 37.2 (CH<sub>2</sub>), 31.5 (CH<sub>2</sub>), 29.3 (CH<sub>2</sub>, minor), 28.8 (CH<sub>2</sub>), 28.5 (CH<sub>2</sub>), 25.6 (CH<sub>2</sub>), 14.1 (CH<sub>3</sub>). HRMS (ESI-TOF): calcd for [C<sub>17</sub>H<sub>24</sub>NO] (M+H)<sup>+</sup> 258.1852, found 258.1853.

Compound **22**: Isolated with hexane/EtOAc 1:1, as 7:3 mixture of isomers. Brown oil. <sup>1</sup>H NMR (CDCl<sub>3</sub>, 300 MHz): δ 7.48-7.15 (m, 10H), 5.90–5.60 (m, 2H), 5.44 (dd, *J* = 9.7, 6.5 Hz, 1H), 5.38-5.24 (m, 1H), 5.24–4.99 (m, 4H), 3.47–3.33 (m, 1H), 3.26–3.02 (m, 1H), 2.99–2.83 (m, 1H), 2.79–2.48 (m, 6H), 2.44–2.23 (m, 1H), 2.03 (td, *J* = 16.8, 6.8 Hz, 1H), 1.09 (d, *J* = 6.7 Hz, 3H), 0.96 (d, *J* = 6.7 Hz, 3H). <sup>13</sup>C NMR (CDCl<sub>3</sub>, 75 MHz): δ 175.1 (C, minor), 174.6 (C, major), 139.1 (C, minor), 139.0 (C, major), 134.7 (CH<sub>2</sub>, major), 134.7 (CH<sub>2</sub>, minor), 128.6 (CH), 127.8 (CH, minor), 127.7 (CH, major), 127.6 (CH), 127.6 (CH, major), 127.4 (CH, minor), 117.6 (CH, minor), 117.5 (CH, major), 53.1 (CH<sub>2</sub>, major), 52.9 (CH<sub>2</sub>, minor), 49.8 (CH<sub>2</sub>, minor), 49.7 (CH<sub>2</sub>, major), 39.9 (CH<sub>2</sub>, major), 39.8 (CH<sub>2</sub>, minor), 34.8 (CH, minor), 34.7 (CH, major), 26.7 (CH, major), 26.6 (CH, minor), 20.1 (CH<sub>3</sub>, minor), 19.5 (CH<sub>3</sub>, major). HRMS (ESI-TOF): calcd for [C<sub>15</sub>H<sub>20</sub>NO] (M+H)<sup>+</sup> 230.1539, found 230.1547.

Compound **23**: Isolated with hexane/EtOAc 6:4, as a 2:1 mixture of isomers. Major isomer: Yellowish oil. <sup>1</sup>H NMR (CDCl<sub>3</sub>, 300 MHz): δ 7.39-7.19 (m, 5H), 4.70 (br s, 2H), 4.46 (s, 2H), 2.99 (s, 2H), 2.38 (s, 2H), 1.72 (s, 3H), 1.72-1.62 (m, 4H), 1.41-1.21 (m, 4H). <sup>13</sup>C NMR (CDCl<sub>3</sub>, 75 MHz): δ 173.9 (C), 149.7 (C), 136.6 (C), 128.7 (CH), 128.2 (CH), 127.6 (CH), 108.7 (CH<sub>2</sub>), 60.1 (CH<sub>2</sub>), 46.5 (CH<sub>2</sub>), 44.7 (C), 41.6 (CH<sub>2</sub>), 36.9 (CH<sub>2</sub>), 36.1 (CH), 28.0 (CH<sub>2</sub>), 21.0 (CH<sub>3</sub>). HRMS (ESI-TOF): calcd for [C<sub>19</sub>H<sub>26</sub>NO] (M+H)<sup>+</sup> 284.2009, found 284.2019.

Minor isomer: Yellowish oil. <sup>1</sup>H NMR (CDCl<sub>3</sub>, 300 MHz): δ 7.35–7.05 (m, 5H), 4.66–4.48 (m, 2H), 4.36 (s, 2H), 2.99 (s, 2H), 2.21 (s, 2H), 1.81-1.52 (m, 4H), 1.60 (s, 3H),

1.44-1.23 (m, 2H), 1.13-0.94 (m, 2H).  $^{13}\text{C}$  NMR ( $\text{CDCl}_3$ , 75 MHz):  $\delta$  174.0 (C), 149.8 (C), 136.7 (C), 128.8 (CH), 128.1 (CH), 127.7 (CH), 108.6 ( $\text{CH}_2$ ), 55.4 ( $\text{CH}_2$ ), 46.7 ( $\text{CH}_2$ ), 46.6 ( $\text{CH}_2$ ), 44.2 (C), 36.9 ( $\text{CH}_2$ ), 35.8 (CH), 28.0 ( $\text{CH}_2$ ), 21.2 ( $\text{CH}_3$ ). HRMS (ESI-TOF): calcd for  $[\text{C}_{19}\text{H}_{26}\text{NO}] (\text{M}+\text{H})^+$  284.2009, found 284.2019.

Compound **24**: Isolated with hexane/EtOAc 1:1, as a 1:1 mixture of rotamers.

Yellowish oil.  $^1\text{H}$  NMR ( $\text{CDCl}_3$ , 300 MHz):  $\delta$  7.40–7.15 (m, 10H), 5.84–5.64 (m, 2H), 5.12–4.96 (m, 4H), 4.62 and 4.53 (2s, 2H each), 3.44 and 3.27 (2t,  $J = 7.2$  Hz, 2H each), 2.29 (dt,  $J = 14.8, 7.0$  Hz, 4H), 2.18 and 2.11 (s, 3H each).  $^{13}\text{C}$  NMR ( $\text{CDCl}_3$ , 75 MHz):  $\delta$  171.0 (C), 170.6 (C), 137.7 (C), 136.9 (C), 135.5 (CH), 134.3 (CH), 128.9 (CH), 128.6 (CH), 128.0 (CH), 127.8 (CH), 127.3 (CH), 126.2 (CH), 117.6 ( $\text{CH}_2$ ), 116.7 ( $\text{CH}_2$ ), 52.3 ( $\text{CH}_2$ ), 48.1 ( $\text{CH}_2$ ), 47.4 ( $\text{CH}_2$ ), 45.6 ( $\text{CH}_2$ ), 32.8 ( $\text{CH}_2$ ), 32.1 ( $\text{CH}_2$ ), 21.8 ( $\text{CH}_3$ ), 21.6 ( $\text{CH}_3$ ). HRMS (ESI-TOF): calcd for  $[\text{C}_{13}\text{H}_{18}\text{NO}] (\text{M}+\text{H})^+$  204.1383, found 204.1391.

Compound **25**: Isolated with hexane/EtOAc 6:4.<sup>12</sup>

Compound **26** and **27**: Isolated with hexane/EtOAc 6:4, as a 1:1 mixture of isomers.

Colorless oil.  $^1\text{H}$  NMR ( $\text{CDCl}_3$ , 300 MHz):  $\delta$  7.44-7.09 (m, 10H), 5.37 and 5.33 (2d,  $J = 15$  Hz, 1H each), 4.72 (s, 1H, isomer **26**), 4.67 (s, 1H, isomer **26**), 3.97 and 3.90 (2d,  $J = 15$  Hz, 1H each), 3.59-3.52 and 3.49-3.42 (2m, 1H each), 2.86–2.72 (m, 2H), 2.60–2.35 (m, 3H), 2.33–2.15 (m, 3H), 2.02-1.88 (m, 4H), 1.87–1.58 (m, 6H), 1.55-1.39 (m, 2H), 0.95 (d,  $J = 6.9$  Hz, 3H, isomer **27**).  $^{13}\text{C}$  NMR ( $\text{CDCl}_3$ , 75 MHz):  $\delta$  171.4 (2C), 150.3 (C, isomer **26**), 137.9 (C), 137.7 (C), 128.7 (CH), 128.6 (CH), 127.9 (CH), 127.8 (CH), 127.4 (CH), 127.3 (CH), 108.0 ( $\text{CH}_2$ , isomer **26**), 51.1 (CH), 50.9 (CH), 48.2 ( $\text{CH}_2$ ), 48.0 ( $\text{CH}_2$ ), 38.3 ( $\text{CH}_2$ ), 37.2 (CH), 35.6 (CH), 33.7 ( $\text{CH}_2$ ), 33.6 ( $\text{CH}_2$ ), 33.1 (CH), 31.9 ( $\text{CH}_2$ ), 30.0 ( $\text{CH}_2$ ), 29.0 ( $\text{CH}_2$ ), 26.5 ( $\text{CH}_2$ ), 25.3 ( $\text{CH}_2$ ), 19.8 ( $\text{CH}_3$ , isomer **27**). For **26**:



HRMS (ESI-TOF): calcd for [C<sub>16</sub>H<sub>20</sub>NO] (M+H)<sup>+</sup> 242.1539, found 242.1540. For **27**:

HRMS (ESI-TOF): calcd for [C<sub>16</sub>H<sub>22</sub>NO] (M+H)<sup>+</sup> 244.1696, found 244.1693.

**Cyclization of compound 1 mediated by Cp<sub>2</sub>TiCl in the presence of H<sub>2</sub>O or D<sub>2</sub>O:**

Strictly deoxygenated THF (20 mL, passing Ar for 15 min) was added to a mixture of Cp<sub>2</sub>TiCl<sub>2</sub> (696 mg, 2.8 mmol) and Mn dust (306 mg, 5.6 mmol) under an Ar atmosphere, and the suspension was stirred at room temperature until it turned lime green (after about 15 min). Then, a solution of trichloroacetamide **1** (150 mg, 0.47 mmol), and H<sub>2</sub>O (92 mg, 4.7 mmol) or D<sub>2</sub>O (94 mg, 4.7 mmol) in THF (2 mL) were added, and the mixture was stirred for 72 h. The reaction was then quenched with 2N HCl, and extracted with EtOAc. The organic layer was washed with brine, dried, and the solvent removed. The residue was purified by flash chromatography (hexane/EtOAc 6:4) to yield **2** (34 mg, 36%), or **2d** (28 mg, 30%, 46% deuterium incorporation).

Compound **2d**: Colorless oil. <sup>1</sup>H NMR (CDCl<sub>3</sub>, 300 MHz): δ 7.40-7.19 (m, 5H), 4.47 (s, 2H), 2.98 (s, 2H), 1.12 (s, 5H). <sup>13</sup>C NMR (CDCl<sub>3</sub>, 75 MHz): δ 174.3 (C), 136.7 (C), 128.8 (CH), 128.3 (CH), 127.7 (CH), 59.8 (CH<sub>2</sub>), 46.6 (CH<sub>2</sub>), 29.8 (C), 27.9 (CH<sub>3</sub>).

HRMS (ESI-TOF): calcd for [C<sub>13</sub>H<sub>15</sub>D<sub>3</sub>NO] (M+H)<sup>+</sup> 207.1571, found 207.1579.

**General procedure for cyclization of 1 catalyzed by Cp<sub>2</sub>TiCl in the presence of**

**H<sub>2</sub>O:** Strictly deoxygenated THF (20 mL, passing Ar for 15 min) was added to a mixture of Cp<sub>2</sub>TiCl<sub>2</sub> (0.4, 0.6 or 0.8 mmol, see Table 1), collidine hydrochloride (4 mmol), and Mn dust (8 mmol) under an Ar atmosphere, and the suspension was stirred at room temperature until it turned lime green (after about 15 min). Then, a solution of trichloroacetamide **1** (1 mmol), and H<sub>2</sub>O (10 mmol) in THF (2 mL) were added, and the mixture was stirred for 72 h. The reaction was then quenched with 2N HCl, and

extracted with EtOAc. The organic layer was washed with brine, dried, and the solvent removed. The residue was purified by flash chromatography (hexane/EtOAc 6:4) to yield **4** (see Table 1).

### Computational General Information.

All reported structures were optimized at DFT level by using the B3LYP<sup>13(1-SI)</sup> hybrid functional as implemented in Gaussian 09.<sup>14(2-SI)</sup> Optimizations were carried out by using the standard 6-31G(d,p) basis set for all atoms. Reported energy values correspond to Enthalpies (H). The critical stationary points were characterized by frequency calculations in order to verify that they have the right number of imaginary frequencies, and the intrinsic reaction coordinates (IRC)<sup>15(3)</sup> were followed to verify the energy profiles connecting the key transition structures to the correct associated local minima. The structures were also single-point refined at M06-2X/6-31+G(d,p) (iefpcm,solvent=THF) level of theory.

### 1-rad

E (B3LYP)                -1554.35073515  
Correction to Enthalpy        0,259492  
E (M06-2X)               -1554.02172063

Standard orientation:

| -----  |        |        |                         |           |           |
|--------|--------|--------|-------------------------|-----------|-----------|
| Center | Atomic | Atomic | Coordinates (Angstroms) |           |           |
| Number | Number | Type   | X                       | Y         | Z         |
| -----  |        |        |                         |           |           |
| 1      | 6      | 0      | 1.372821                | 2.827215  | -0.898990 |
| 2      | 6      | 0      | 1.136457                | -0.607810 | -0.821055 |
| 3      | 6      | 0      | 0.252624                | 1.199189  | 0.657448  |

|    |    |   |           |           |           |
|----|----|---|-----------|-----------|-----------|
| 4  | 7  | 0 | 0.142097  | 0.236859  | -0.440757 |
| 5  | 6  | 0 | 0.831693  | 2.553978  | 0.288444  |
| 6  | 6  | 0 | 2.276713  | -0.804211 | 0.140304  |
| 7  | 6  | 0 | -1.053310 | 0.357142  | -1.293444 |
| 8  | 6  | 0 | 0.748138  | 3.565701  | 1.401640  |
| 9  | 1  | 0 | 1.783628  | 3.808094  | -1.110876 |
| 10 | 1  | 0 | -0.753150 | 1.338346  | 1.066405  |
| 11 | 1  | 0 | 1.426029  | 2.093699  | -1.694793 |
| 12 | 1  | 0 | 0.838524  | 0.775585  | 1.473435  |
| 13 | 1  | 0 | -1.159521 | 1.401000  | -1.597608 |
| 14 | 1  | 0 | -0.865113 | -0.230534 | -2.191199 |
| 15 | 8  | 0 | 1.150945  | -1.225839 | -1.883890 |
| 16 | 17 | 0 | 3.852806  | -1.002161 | -0.520201 |
| 17 | 17 | 0 | 1.987974  | -1.556185 | 1.672804  |
| 18 | 1  | 0 | -0.294902 | 3.758514  | 1.676494  |
| 19 | 1  | 0 | 1.208555  | 4.511683  | 1.113648  |
| 20 | 1  | 0 | 1.249788  | 3.199372  | 2.304331  |
| 21 | 6  | 0 | -2.323153 | -0.112103 | -0.607493 |
| 22 | 6  | 0 | -3.454408 | 0.708060  | -0.584740 |
| 23 | 6  | 0 | -2.397713 | -1.381590 | -0.021770 |
| 24 | 6  | 0 | -4.641852 | 0.269003  | 0.003610  |
| 25 | 1  | 0 | -3.408648 | 1.696392  | -1.030716 |
| 26 | 6  | 0 | -3.579761 | -1.820569 | 0.570229  |
| 27 | 1  | 0 | -1.528178 | -2.029945 | -0.028568 |
| 28 | 6  | 0 | -4.706910 | -0.996270 | 0.583580  |
| 29 | 1  | 0 | -5.510545 | 0.917782  | 0.012726  |
| 30 | 1  | 0 | -3.623284 | -2.806959 | 1.018414  |
| 31 | 1  | 0 | -5.626712 | -1.338863 | 1.043903  |

-----

**TS1**

E (B3LYP)                    -1554.33860269

Correction to Enthalpy        0.257593

E (M06-2X) -1554.01432742  
Frequency -435.2977

Standard orientation:

---

| Center | Atomic | Atomic | Coordinates (Angstroms) |           |           |
|--------|--------|--------|-------------------------|-----------|-----------|
| Number | Number | Type   | X                       | Y         | Z         |
| 1      | 6      | 0      | -2.126906               | 2.590892  | 0.277554  |
| 2      | 6      | 0      | -0.916507               | -1.008920 | -0.400918 |
| 3      | 6      | 0      | -0.233776               | 1.306562  | -0.710274 |
| 4      | 7      | 0      | 0.024358                | -0.133929 | -0.812798 |
| 5      | 6      | 0      | -1.166373               | 1.625039  | 0.447803  |
| 6      | 6      | 0      | -2.187463               | -0.295768 | 0.038879  |
| 7      | 6      | 0      | 1.252345                | -0.595428 | -1.471191 |
| 8      | 6      | 0      | -0.615474               | 1.360243  | 1.835462  |
| 9      | 1      | 0      | -2.667301               | 2.993064  | 1.126439  |
| 10     | 1      | 0      | 0.727712                | 1.800962  | -0.542753 |
| 11     | 1      | 0      | -2.425751               | 2.926156  | -0.708242 |
| 12     | 1      | 0      | -0.643217               | 1.684245  | -1.652853 |
| 13     | 1      | 0      | 1.331730                | -0.089503 | -2.437620 |
| 14     | 1      | 0      | 1.122193                | -1.661151 | -1.660240 |
| 15     | 8      | 0      | -0.806468               | -2.230007 | -0.379988 |
| 16     | 17     | 0      | -2.959806               | -0.964791 | 1.458731  |
| 17     | 17     | 0      | -3.304762               | -0.067841 | -1.312281 |
| 18     | 1      | 0      | -0.174356               | 0.367113  | 1.932674  |
| 19     | 1      | 0      | -1.392140               | 1.468055  | 2.593318  |
| 20     | 1      | 0      | 0.174378                | 2.087381  | 2.050936  |
| 21     | 6      | 0      | 2.505413                | -0.349713 | -0.653096 |
| 22     | 6      | 0      | 3.505265                | 0.506091  | -1.122315 |
| 23     | 6      | 0      | 2.686215                | -0.990366 | 0.579413  |
| 24     | 6      | 0      | 4.666543                | 0.720913  | -0.377492 |
| 25     | 1      | 0      | 3.378143                | 1.006901  | -2.076708 |
| 26     | 6      | 0      | 3.842035                | -0.775296 | 1.325859  |

|    |   |   |          |           |           |
|----|---|---|----------|-----------|-----------|
| 27 | 1 | 0 | 1.920568 | -1.662233 | 0.952499  |
| 28 | 6 | 0 | 4.836321 | 0.081818  | 0.848822  |
| 29 | 1 | 0 | 5.433556 | 1.387663  | -0.755211 |
| 30 | 1 | 0 | 3.970857 | -1.279881 | 2.276897  |
| 31 | 1 | 0 | 5.736681 | 0.247117  | 1.429650  |

**TS2**

E (B3LYP)           -1554.33164404  
Correction to Enthalpy       0.257719  
E (M06-2X)           -1554.00573081  
Frequency            -477.2181

Standard orientation:

| Center<br>Number | Atomic<br>Number | Atomic<br>Type | Coordinates (Angstroms) |           |           |
|------------------|------------------|----------------|-------------------------|-----------|-----------|
|                  |                  |                | X                       | Y         | Z         |
| 1                | 6                | 0              | -1.333889               | 0.786378  | 1.673467  |
| 2                | 6                | 0              | -0.888033               | -0.886288 | -0.576975 |
| 3                | 6                | 0              | -0.107082               | 1.522600  | -0.356689 |
| 4                | 7                | 0              | 0.035522                | 0.105793  | -0.736132 |
| 5                | 6                | 0              | -1.006138               | 1.798731  | 0.818385  |
| 6                | 6                | 0              | -2.204929               | -0.504086 | 0.077648  |
| 7                | 6                | 0              | 1.264829                | -0.201087 | -1.488799 |
| 8                | 6                | 0              | -1.657886               | 3.146097  | 0.852753  |
| 9                | 1                | 0              | -2.076409               | 0.950056  | 2.447278  |
| 10               | 1                | 0              | 0.903153                | 1.892602  | -0.146742 |
| 11               | 1                | 0              | -0.677638               | -0.060546 | 1.830728  |
| 12               | 1                | 0              | -0.468035               | 2.091908  | -1.222744 |
| 13               | 1                | 0              | 1.367800                | 0.539751  | -2.286811 |
| 14               | 1                | 0              | 1.120345                | -1.175194 | -1.953252 |
| 15               | 8                | 0              | -0.674134               | -2.054247 | -0.894636 |

|    |    |   |           |           |           |
|----|----|---|-----------|-----------|-----------|
| 16 | 17 | 0 | -3.052454 | -1.848523 | 0.826341  |
| 17 | 17 | 0 | -3.255277 | 0.466987  | -0.965657 |
| 18 | 1  | 0 | -0.900944 | 3.939717  | 0.865910  |
| 19 | 1  | 0 | -2.286693 | 3.262463  | 1.736228  |
| 20 | 1  | 0 | -2.271636 | 3.314137  | -0.040266 |
| 21 | 6  | 0 | 2.514856  | -0.206936 | -0.629713 |
| 22 | 6  | 0 | 3.603399  | 0.605945  | -0.957518 |
| 23 | 6  | 0 | 2.611139  | -1.046243 | 0.487604  |
| 24 | 6  | 0 | 4.769280  | 0.581627  | -0.189630 |
| 25 | 1  | 0 | 3.541209  | 1.262107  | -1.819825 |
| 26 | 6  | 0 | 3.771384  | -1.069455 | 1.257728  |
| 27 | 1  | 0 | 1.776516  | -1.686150 | 0.752186  |
| 28 | 6  | 0 | 4.855217  | -0.255612 | 0.920668  |
| 29 | 1  | 0 | 5.604326  | 1.219292  | -0.457386 |
| 30 | 1  | 0 | 3.832920  | -1.725419 | 2.118961  |
| 31 | 1  | 0 | 5.758051  | -0.275208 | 1.520557  |

**TS3**

E (B3LYP)                -1786.84841981  
Correction to Enthalpy        0.377830  
E (M06-2X)               -1786.41579186  
Frequency                 -1464.5875

Standard orientation:

| Center<br>Number | Atomic<br>Number | Atomic<br>Type | Coordinates (Angstroms) |          |           |
|------------------|------------------|----------------|-------------------------|----------|-----------|
|                  |                  |                | X                       | Y        | Z         |
| 1                | 6                | 0              | -1.641720               | 3.307396 | -1.256860 |
| 2                | 6                | 0              | 0.176516                | 0.042990 | -0.697563 |
| 3                | 6                | 0              | -1.483979               | 1.508911 | 0.495553  |
| 4                | 7                | 0              | -1.074548               | 0.540477 | -0.523534 |

|    |    |   |           |           |           |
|----|----|---|-----------|-----------|-----------|
| 5  | 6  | 0 | -1.865463 | 2.887806  | -0.011809 |
| 6  | 6  | 0 | 1.352734  | 0.540218  | 0.154572  |
| 7  | 6  | 0 | -2.169718 | -0.026447 | -1.342112 |
| 8  | 6  | 0 | -2.512067 | 3.753414  | 1.038283  |
| 9  | 1  | 0 | -1.924003 | 4.307273  | -1.567724 |
| 10 | 1  | 0 | -2.342209 | 1.080109  | 1.026534  |
| 11 | 1  | 0 | -1.164696 | 2.678723  | -1.999644 |
| 12 | 1  | 0 | -0.701925 | 1.611613  | 1.246650  |
| 13 | 1  | 0 | -2.805184 | 0.801316  | -1.657863 |
| 14 | 1  | 0 | -1.714512 | -0.463093 | -2.229215 |
| 15 | 8  | 0 | 0.440214  | -0.833625 | -1.519629 |
| 16 | 17 | 0 | 1.292761  | -0.076990 | 1.833486  |
| 17 | 1  | 0 | -3.442755 | 3.302653  | 1.400429  |
| 18 | 1  | 0 | -2.739316 | 4.746675  | 0.648848  |
| 19 | 1  | 0 | -1.857079 | 3.867768  | 1.909512  |
| 20 | 6  | 0 | -3.000950 | -1.059668 | -0.604777 |
| 21 | 6  | 0 | -4.350916 | -0.817483 | -0.333641 |
| 22 | 6  | 0 | -2.438857 | -2.277000 | -0.196595 |
| 23 | 6  | 0 | -5.127932 | -1.768103 | 0.331200  |
| 24 | 1  | 0 | -4.800204 | 0.119475  | -0.646753 |
| 25 | 6  | 0 | -3.211056 | -3.225102 | 0.470454  |
| 26 | 1  | 0 | -1.395802 | -2.482338 | -0.408951 |
| 27 | 6  | 0 | -4.558761 | -2.973423 | 0.736532  |
| 28 | 1  | 0 | -6.173622 | -1.564226 | 0.532857  |
| 29 | 1  | 0 | -2.763620 | -4.163651 | 0.778323  |
| 30 | 1  | 0 | -5.159076 | -3.713268 | 1.253929  |
| 31 | 6  | 0 | 3.579275  | -0.576751 | -0.962908 |
| 32 | 1  | 0 | 3.450848  | -0.322420 | -2.015376 |
| 33 | 6  | 0 | 3.665930  | -2.056814 | -0.583234 |
| 34 | 1  | 0 | 3.601392  | -2.702060 | -1.460990 |
| 35 | 1  | 0 | 2.848460  | -2.335463 | 0.086657  |
| 36 | 6  | 0 | 5.030192  | -2.159837 | 0.134639  |
| 37 | 1  | 0 | 5.022349  | -2.871721 | 0.961018  |
| 38 | 1  | 0 | 5.812631  | -2.456696 | -0.567803 |

|    |    |   |          |           |           |
|----|----|---|----------|-----------|-----------|
| 39 | 6  | 0 | 5.267420 | -0.725993 | 0.603185  |
| 40 | 1  | 0 | 6.316054 | -0.442839 | 0.688111  |
| 41 | 1  | 0 | 4.760147 | -0.515244 | 1.551295  |
| 42 | 8  | 0 | 4.686761 | 0.091756  | -0.439215 |
| 43 | 17 | 0 | 1.701704 | 2.282776  | 0.071876  |
| 44 | 1  | 0 | 2.508368 | -0.074050 | -0.435046 |

**13-rad**

E (B3LYP)                -1554.34716544

Correction to Enthalpy        0.262894

E (M06-2X)               -1554.01520511

Standard orientation:

| Center<br>Number | Atomic<br>Number | Atomic<br>Type | Coordinates (Angstroms) |           |           |
|------------------|------------------|----------------|-------------------------|-----------|-----------|
|                  |                  |                | X                       | Y         | Z         |
| 1                | 6                | 0              | 1.201100                | -0.821579 | -0.814948 |
| 2                | 6                | 0              | 0.253826                | 1.190165  | 0.323908  |
| 3                | 7                | 0              | 0.168728                | 0.026244  | -0.571443 |
| 4                | 6                | 0              | 2.346887                | -0.799419 | 0.159762  |
| 5                | 6                | 0              | -1.032035               | -0.059441 | -1.422009 |
| 6                | 1                | 0              | -0.755654               | 1.388493  | 0.689196  |
| 7                | 1                | 0              | 0.856947                | 0.946147  | 1.195746  |
| 8                | 1                | 0              | -1.170359               | 0.894544  | -1.936955 |
| 9                | 1                | 0              | -0.831793               | -0.814741 | -2.180385 |
| 10               | 8                | 0              | 1.247412                | -1.610470 | -1.757888 |
| 11               | 17               | 0              | 3.932512                | -1.040473 | -0.464383 |
| 12               | 17               | 0              | 2.086508                | -1.288957 | 1.799757  |
| 13               | 6                | 0              | -2.282800               | -0.407530 | -0.637422 |
| 14               | 6                | 0              | -3.386175               | 0.449593  | -0.641783 |
| 15               | 6                | 0              | -2.360019               | -1.604059 | 0.086431  |



|    |   |   |           |           |           |
|----|---|---|-----------|-----------|-----------|
| 16 | 6 | 0 | -4.547401 | 0.120927  | 0.060691  |
| 17 | 1 | 0 | -3.339458 | 1.380405  | -1.197882 |
| 18 | 6 | 0 | -3.515579 | -1.933182 | 0.790569  |
| 19 | 1 | 0 | -1.512823 | -2.281630 | 0.099053  |
| 20 | 6 | 0 | -4.614009 | -1.070619 | 0.779572  |
| 21 | 1 | 0 | -5.394520 | 0.797540  | 0.047948  |
| 22 | 1 | 0 | -3.561572 | -2.863590 | 1.345498  |
| 23 | 1 | 0 | -5.513305 | -1.327524 | 1.327830  |
| 24 | 6 | 0 | 0.822266  | 2.443182  | -0.372233 |
| 25 | 1 | 0 | 0.208777  | 2.705263  | -1.238664 |
| 26 | 1 | 0 | 1.825840  | 2.203376  | -0.743186 |
| 27 | 6 | 0 | 0.901136  | 3.610784  | 0.571162  |
| 28 | 1 | 0 | 1.544043  | 3.478515  | 1.440295  |
| 29 | 6 | 0 | 0.248693  | 4.762107  | 0.418152  |
| 30 | 1 | 0 | -0.402770 | 4.938373  | -0.433042 |
| 31 | 1 | 0 | 0.347561  | 5.569606  | 1.135286  |

**TS4**

E (B3LYP)                -1554.32617375

Correction to Enthalpy        0.258393

E (M06-2X)               -1553.99964144

Frequency                -389.7718

Standard orientation:

| Center<br>Number | Atomic<br>Number | Atomic<br>Type | Coordinates (Angstroms) |           |           |
|------------------|------------------|----------------|-------------------------|-----------|-----------|
|                  |                  |                | X                       | Y         | Z         |
| 1                | 6                | 0              | -2.014780               | 1.383635  | 1.324598  |
| 2                | 6                | 0              | -0.685010               | -0.660271 | -0.673786 |
| 3                | 6                | 0              | 0.079071                | 1.696260  | -0.084772 |
| 4                | 7                | 0              | 0.155648                | 0.394547  | -0.780550 |

|    |    |   |           |           |           |
|----|----|---|-----------|-----------|-----------|
| 5  | 6  | 0 | -2.058077 | -0.440010 | -0.032737 |
| 6  | 6  | 0 | 1.426377  | 0.179264  | -1.504043 |
| 7  | 1  | 0 | 0.708112  | 1.639795  | 0.811057  |
| 8  | 1  | 0 | -1.383583 | 0.832584  | 2.018124  |
| 9  | 1  | 0 | 0.550114  | 2.418794  | -0.754162 |
| 10 | 1  | 0 | 1.578036  | 1.041649  | -2.156829 |
| 11 | 1  | 0 | 1.294280  | -0.701900 | -2.129185 |
| 12 | 8  | 0 | -0.432733 | -1.779311 | -1.115497 |
| 13 | 17 | 0 | -2.523274 | -1.757983 | 1.036341  |
| 14 | 17 | 0 | -3.273772 | -0.096687 | -1.270981 |
| 15 | 6  | 0 | 2.630803  | 0.006180  | -0.596208 |
| 16 | 6  | 0 | 3.702540  | 0.900492  | -0.664585 |
| 17 | 6  | 0 | 2.698883  | -1.062325 | 0.307573  |
| 18 | 6  | 0 | 4.824270  | 0.733591  | 0.149690  |
| 19 | 1  | 0 | 3.662723  | 1.732805  | -1.360027 |
| 20 | 6  | 0 | 3.814726  | -1.227628 | 1.124869  |
| 21 | 1  | 0 | 1.878456  | -1.768766 | 0.365151  |
| 22 | 6  | 0 | 4.881661  | -0.329914 | 1.048079  |
| 23 | 1  | 0 | 5.647715  | 1.435888  | 0.083430  |
| 24 | 1  | 0 | 3.855231  | -2.060329 | 1.818259  |
| 25 | 1  | 0 | 5.750361  | -0.460929 | 1.683366  |
| 26 | 6  | 0 | -1.297685 | 2.222196  | 0.295900  |
| 27 | 1  | 0 | -1.126648 | 3.222422  | 0.710531  |
| 28 | 1  | 0 | -1.924157 | 2.360967  | -0.589649 |
| 29 | 6  | 0 | -3.311485 | 1.597278  | 1.681774  |
| 30 | 1  | 0 | -3.754321 | 1.079462  | 2.523791  |
| 31 | 1  | 0 | -3.961975 | 2.237121  | 1.094730  |

-----

**TS5**

E (B3LYP)                   -1554.32749389  
Correction to Enthalpy        0.258641  
E (M06-2X)                   -1554.00194829

Frequency            -464.0812

Standard orientation:

| -----  |        |        |                         |           |           |
|--------|--------|--------|-------------------------|-----------|-----------|
| Center | Atomic | Atomic | Coordinates (Angstroms) |           |           |
| Number | Number | Type   | X                       | Y         | Z         |
| -----  |        |        |                         |           |           |
| 1      | 6      | 0      | -0.934062               | -0.299444 | 0.805897  |
| 2      | 6      | 0      | -0.079098               | 1.402133  | -0.847084 |
| 3      | 7      | 0      | 0.036112                | 0.531913  | 0.334511  |
| 4      | 6      | 0      | -2.177129               | -0.514386 | -0.066516 |
| 5      | 6      | 0      | 1.239127                | 0.736526  | 1.159393  |
| 6      | 1      | 0      | 0.935972                | 1.630684  | -1.174531 |
| 7      | 1      | 0      | -0.549976               | 0.860914  | -1.664022 |
| 8      | 1      | 0      | 1.054538                | 0.261008  | 2.121503  |
| 9      | 1      | 0      | 1.358661                | 1.808262  | 1.338693  |
| 10     | 8      | 0      | -0.854761               | -0.876366 | 1.886255  |
| 11     | 17     | 0      | -3.506879               | -1.258449 | 0.818555  |
| 12     | 17     | 0      | -1.823994               | -1.413110 | -1.565216 |
| 13     | 6      | 0      | 2.502269                | 0.179042  | 0.529207  |
| 14     | 6      | 0      | 2.545526                | -1.134226 | 0.046027  |
| 15     | 6      | 0      | 3.658347                | 0.961197  | 0.459186  |
| 16     | 6      | 0      | 3.721306                | -1.653004 | -0.491590 |
| 17     | 1      | 0      | 1.655840                | -1.752825 | 0.089216  |
| 18     | 6      | 0      | 4.839146                | 0.442695  | -0.075432 |
| 19     | 1      | 0      | 3.637257                | 1.982850  | 0.824971  |
| 20     | 6      | 0      | 4.873167                | -0.866010 | -0.552688 |
| 21     | 1      | 0      | 3.740332                | -2.672417 | -0.860655 |
| 22     | 1      | 0      | 5.726980                | 1.063281  | -0.123339 |
| 23     | 1      | 0      | 5.787768                | -1.270675 | -0.971153 |
| 24     | 6      | 0      | -0.849285               | 2.704263  | -0.549603 |
| 25     | 1      | 0      | -0.308250               | 3.303850  | 0.185927  |
| 26     | 1      | 0      | -0.874927               | 3.291649  | -1.476919 |

|    |   |   |           |          |           |
|----|---|---|-----------|----------|-----------|
| 27 | 6 | 0 | -3.021045 | 1.455056 | -0.668843 |
| 28 | 1 | 0 | -2.836844 | 1.170105 | -1.698795 |
| 29 | 1 | 0 | -4.024613 | 1.272505 | -0.306042 |
| 30 | 6 | 0 | -2.239612 | 2.405262 | -0.064385 |
| 31 | 1 | 0 | -2.564534 | 2.840228 | 0.875366  |

**TS6**

E (B3LYP) -1786.84505907  
 Correction to Enthalpy 0.378490  
 E (M06-2X) -1786.40975062  
 Frequency -1465.2694

Standard orientation:

| Center<br>Number | Atomic<br>Number | Atomic<br>Type | Coordinates (Angstroms) |           |           |
|------------------|------------------|----------------|-------------------------|-----------|-----------|
|                  |                  |                | X                       | Y         | Z         |
| 1                | 6                | 0              | 0.212243                | -0.125714 | -0.769628 |
| 2                | 6                | 0              | -1.517504               | 1.419767  | 0.218123  |
| 3                | 7                | 0              | -1.058933               | 0.339114  | -0.667182 |
| 4                | 6                | 0              | 1.356204                | 0.510103  | 0.032614  |
| 5                | 6                | 0              | -2.109960               | -0.347702 | -1.445316 |
| 6                | 1                | 0              | -2.383559               | 1.041102  | 0.769712  |
| 7                | 1                | 0              | -0.750535               | 1.636845  | 0.955427  |
| 8                | 1                | 0              | -2.726382               | 0.409417  | -1.932277 |
| 9                | 1                | 0              | -1.608601               | -0.918734 | -2.224680 |
| 10               | 8                | 0              | 0.524239                | -1.078583 | -1.483744 |
| 11               | 17               | 0              | 1.290469                | 0.113642  | 1.774483  |
| 12               | 6                | 0              | -2.986622               | -1.256056 | -0.603208 |
| 13               | 6                | 0              | -4.367427               | -1.048656 | -0.542318 |
| 14               | 6                | 0              | -2.433292               | -2.328993 | 0.107728  |
| 15               | 6                | 0              | -5.184319               | -1.895470 | 0.209274  |

|    |    |   |           |           |           |
|----|----|---|-----------|-----------|-----------|
| 16 | 1  | 0 | -4.809320 | -0.220574 | -1.087195 |
| 17 | 6  | 0 | -3.245468 | -3.172681 | 0.861815  |
| 18 | 1  | 0 | -1.364343 | -2.506047 | 0.066483  |
| 19 | 6  | 0 | -4.624586 | -2.958794 | 0.914439  |
| 20 | 1  | 0 | -6.253732 | -1.720247 | 0.245597  |
| 21 | 1  | 0 | -2.803847 | -4.000405 | 1.405583  |
| 22 | 1  | 0 | -5.255714 | -3.617010 | 1.500810  |
| 23 | 6  | 0 | 3.634517  | -0.656058 | -0.917372 |
| 24 | 1  | 0 | 3.538210  | -0.470904 | -1.987760 |
| 25 | 6  | 0 | 3.724347  | -2.107498 | -0.441464 |
| 26 | 1  | 0 | 3.680518  | -2.808858 | -1.276286 |
| 27 | 1  | 0 | 2.895977  | -2.348272 | 0.229771  |
| 28 | 6  | 0 | 5.074864  | -2.151619 | 0.307035  |
| 29 | 1  | 0 | 5.059938  | -2.816311 | 1.171778  |
| 30 | 1  | 0 | 5.874991  | -2.475725 | -0.362756 |
| 31 | 6  | 0 | 5.283126  | -0.690675 | 0.698417  |
| 32 | 1  | 0 | 6.325830  | -0.388502 | 0.790870  |
| 33 | 1  | 0 | 4.751145  | -0.433867 | 1.621241  |
| 34 | 8  | 0 | 4.717199  | 0.058631  | -0.402116 |
| 35 | 17 | 0 | 1.655583  | 2.239970  | -0.273057 |
| 36 | 1  | 0 | 2.540824  | -0.133472 | -0.460285 |
| 37 | 6  | 0 | -1.901806 | 2.711396  | -0.530425 |
| 38 | 1  | 0 | -1.028719 | 3.105603  | -1.054757 |
| 39 | 1  | 0 | -2.659943 | 2.478825  | -1.286463 |
| 40 | 6  | 0 | -2.456279 | 3.743212  | 0.412170  |
| 41 | 1  | 0 | -3.354335 | 3.456771  | 0.958039  |
| 42 | 6  | 0 | -1.932756 | 4.950729  | 0.618337  |
| 43 | 1  | 0 | -1.038384 | 5.280158  | 0.097600  |
| 44 | 1  | 0 | -2.383558 | 5.652865  | 1.311140  |

-----

**14-rad**

E (B3LYP)                    -1631.7901635

Correction to Enthalpy      0.300403  
E (M06-2X)                -1631.43475819

Standard orientation:

| -----  |        |        |                         |           |           |  |
|--------|--------|--------|-------------------------|-----------|-----------|--|
| Center | Atomic | Atomic | Coordinates (Angstroms) |           |           |  |
| Number | Number | Type   | X                       | Y         | Z         |  |
| -----  |        |        |                         |           |           |  |
| 1      | 1      | 0      | 0.763342                | -1.442097 | 1.783791  |  |
| 2      | 1      | 0      | 0.587298                | -2.718872 | 0.582700  |  |
| 3      | 1      | 0      | 2.450770                | -3.389404 | 1.941278  |  |
| 4      | 1      | 0      | 3.142907                | -1.787114 | 1.966914  |  |
| 5      | 1      | 0      | 4.327759                | -3.469559 | 0.313760  |  |
| 6      | 1      | 0      | 2.374417                | -0.726300 | -2.137376 |  |
| 7      | 1      | 0      | 1.295323                | -2.096447 | -2.012291 |  |
| 8      | 1      | 0      | 3.855190                | -2.707941 | -1.921717 |  |
| 9      | 6      | 0      | 1.242470                | -1.909158 | 0.920392  |  |
| 10     | 6      | 0      | 2.603666                | -2.496980 | 1.325329  |  |
| 11     | 6      | 0      | 3.459431                | -2.841136 | 0.134296  |  |
| 12     | 6      | 0      | 2.042360                | -1.517304 | -1.456209 |  |
| 13     | 6      | 0      | 1.416618                | -0.877900 | -0.201186 |  |
| 14     | 6      | 0      | 3.203851                | -2.412833 | -1.103530 |  |
| 15     | 7      | 0      | 0.159882                | -0.159996 | -0.526161 |  |
| 16     | 6      | 0      | 0.101441                | 1.194232  | -0.678763 |  |
| 17     | 6      | 0      | 1.088459                | 2.027786  | 0.074441  |  |
| 18     | 17     | 0      | 1.516214                | 3.561047  | -0.572309 |  |
| 19     | 17     | 0      | 1.331409                | 1.818945  | 1.773312  |  |
| 20     | 8      | 0      | -0.747377               | 1.759323  | -1.366368 |  |
| 21     | 6      | 0      | -0.956959               | -0.918540 | -1.113566 |  |
| 22     | 1      | 0      | -0.686181               | -1.973948 | -1.066071 |  |
| 23     | 1      | 0      | -1.062618               | -0.659771 | -2.170211 |  |
| 24     | 6      | 0      | -2.293683               | -0.724813 | -0.416994 |  |
| 25     | 6      | 0      | -4.807842               | -0.499281 | 0.817773  |  |

|    |   |   |           |           |           |
|----|---|---|-----------|-----------|-----------|
| 26 | 6 | 0 | -3.467352 | -0.753592 | -1.176792 |
| 27 | 6 | 0 | -2.394565 | -0.577848 | 0.969493  |
| 28 | 6 | 0 | -3.642109 | -0.463319 | 1.582619  |
| 29 | 6 | 0 | -4.716225 | -0.645713 | -0.566221 |
| 30 | 1 | 0 | -3.404304 | -0.854192 | -2.255606 |
| 31 | 1 | 0 | -1.496653 | -0.544499 | 1.575042  |
| 32 | 1 | 0 | -3.702260 | -0.346514 | 2.659082  |
| 33 | 1 | 0 | -5.615211 | -0.667011 | -1.172183 |
| 34 | 1 | 0 | -5.777184 | -0.408961 | 1.294813  |
| 35 | 1 | 0 | 2.120296  | -0.123447 | 0.148587  |

-----

**TS7**

E (B3LYP)           -1631.7706594  
 Correction to Enthalpy    0.295161  
 E (M06-2X)           -1631.42127352  
 Frequency            -355.9628

Standard orientation:

-----

| Center | Atomic | Atomic | Coordinates (Angstroms) |           |           |
|--------|--------|--------|-------------------------|-----------|-----------|
| Number | Number | Type   | X                       | Y         | Z         |
| 1      | 6      | 0      | 2.311115                | 0.776863  | 1.458179  |
| 2      | 6      | 0      | 0.620520                | -0.567506 | -0.850351 |
| 3      | 6      | 0      | 0.049493                | 1.437839  | 0.631777  |
| 4      | 7      | 0      | -0.127456               | 0.501397  | -0.499687 |
| 5      | 6      | 0      | 1.876949                | -0.897713 | -0.042110 |
| 6      | 6      | 0      | -1.345642               | 0.742379  | -1.276628 |
| 7      | 1      | 0      | 2.931474                | 0.147619  | 2.089885  |
| 8      | 1      | 0      | -0.966543               | 1.637460  | 0.984014  |
| 9      | 1      | 0      | -1.228369               | 0.265730  | -2.248690 |

|    |    |   |           |           |           |
|----|----|---|-----------|-----------|-----------|
| 10 | 1  | 0 | -1.441050 | 1.817896  | -1.438920 |
| 11 | 8  | 0 | 0.338345  | -1.307638 | -1.781320 |
| 12 | 17 | 0 | 3.284051  | -1.032686 | -1.062087 |
| 13 | 17 | 0 | 1.628638  | -2.308176 | 0.966606  |
| 14 | 6  | 0 | -2.586614 | 0.222648  | -0.578649 |
| 15 | 6  | 0 | -2.565611 | -0.980076 | 0.128662  |
| 16 | 6  | 0 | -3.778544 | 0.941506  | -0.658633 |
| 17 | 6  | 0 | -3.720089 | -1.455902 | 0.742035  |
| 18 | 1  | 0 | -1.644749 | -1.549838 | 0.199174  |
| 19 | 6  | 0 | -4.936038 | 0.464265  | -0.049901 |
| 20 | 1  | 0 | -3.800927 | 1.882605  | -1.198821 |
| 21 | 6  | 0 | -4.909075 | -0.736127 | 0.652765  |
| 22 | 1  | 0 | -3.691713 | -2.390991 | 1.289098  |
| 23 | 1  | 0 | -5.855335 | 1.034218  | -0.117446 |
| 24 | 1  | 0 | -5.807488 | -1.107420 | 1.131336  |
| 25 | 6  | 0 | 0.842506  | 0.854707  | 1.791371  |
| 26 | 1  | 0 | 0.701554  | 1.511657  | 2.655347  |
| 27 | 1  | 0 | 0.445659  | -0.121217 | 2.077395  |
| 28 | 6  | 0 | 2.909505  | 1.666447  | 0.628208  |
| 29 | 1  | 0 | 3.986991  | 1.634472  | 0.505644  |
| 30 | 6  | 0 | 2.130676  | 2.558822  | -0.289729 |
| 31 | 1  | 0 | 2.147197  | 2.106187  | -1.293116 |
| 32 | 1  | 0 | 2.628464  | 3.525764  | -0.397062 |
| 33 | 6  | 0 | 0.686029  | 2.755038  | 0.169616  |
| 34 | 1  | 0 | 0.659245  | 3.441620  | 1.021007  |
| 35 | 1  | 0 | 0.094226  | 3.211089  | -0.626971 |

-----

**TS8**

E (B3LYP)           -1631.76270963  
Correction to Enthalpy       0.295989  
E (M06-2X)         -1631.41356859  
Frequency           -423.4703



Standard orientation:

| -----  |        |        |                         |           |           |  |
|--------|--------|--------|-------------------------|-----------|-----------|--|
| Center | Atomic | Atomic | Coordinates (Angstroms) |           |           |  |
| Number | Number | Type   | X                       | Y         | Z         |  |
| -----  |        |        |                         |           |           |  |
| 1      | 6      | 0      | -2.362219               | 2.150694  | 0.146231  |  |
| 2      | 6      | 0      | -0.719524               | -0.827973 | -0.567070 |  |
| 3      | 6      | 0      | 0.070936                | 1.601945  | -0.168849 |  |
| 4      | 7      | 0      | 0.121326                | 0.225860  | -0.751962 |  |
| 5      | 6      | 0      | -2.136748               | -0.597944 | -0.015579 |  |
| 6      | 6      | 0      | 1.345365                | -0.048970 | -1.542375 |  |
| 7      | 1      | 0      | -3.314904               | 2.456907  | -0.271071 |  |
| 8      | 1      | 0      | 0.972875                | 2.069653  | -0.560180 |  |
| 9      | 1      | 0      | 1.462728                | 0.773716  | -2.251031 |  |
| 10     | 1      | 0      | 1.164048                | -0.958708 | -2.111322 |  |
| 11     | 8      | 0      | -0.427765               | -1.975705 | -0.899447 |  |
| 12     | 17     | 0      | -2.628431               | -1.874956 | 1.113032  |  |
| 13     | 17     | 0      | -3.276303               | -0.466825 | -1.378504 |  |
| 14     | 6      | 0      | 2.609041                | -0.196559 | -0.715638 |  |
| 15     | 6      | 0      | 3.689792                | 0.666585  | -0.917169 |  |
| 16     | 6      | 0      | 2.727201                | -1.213080 | 0.242067  |  |
| 17     | 6      | 0      | 4.867274                | 0.521948  | -0.180584 |  |
| 18     | 1      | 0      | 3.614747                | 1.456523  | -1.657701 |  |
| 19     | 6      | 0      | 3.899297                | -1.356914 | 0.980427  |  |
| 20     | 1      | 0      | 1.899466                | -1.894648 | 0.401785  |  |
| 21     | 6      | 0      | 4.973892                | -0.489308 | 0.771564  |  |
| 22     | 1      | 0      | 5.695865                | 1.200393  | -0.350459 |  |
| 23     | 1      | 0      | 3.977611                | -2.149474 | 1.716415  |  |
| 24     | 1      | 0      | 5.886032                | -0.603587 | 1.346346  |  |
| 25     | 6      | 0      | -1.120662               | 2.458451  | -0.630038 |  |
| 26     | 1      | 0      | -0.842452               | 3.515158  | -0.522068 |  |
| 27     | 1      | 0      | -1.303092               | 2.308857  | -1.700224 |  |

|    |   |   |           |          |          |
|----|---|---|-----------|----------|----------|
| 28 | 6 | 0 | -2.330025 | 1.287174 | 1.208973 |
| 29 | 1 | 0 | -3.270679 | 1.017708 | 1.679854 |
| 30 | 6 | 0 | -1.087890 | 1.072650 | 2.045328 |
| 31 | 1 | 0 | -0.976631 | 0.015902 | 2.300175 |
| 32 | 1 | 0 | -1.238562 | 1.583501 | 3.002844 |
| 33 | 6 | 0 | 0.174565  | 1.620446 | 1.363026 |
| 34 | 1 | 0 | 0.323776  | 2.666538 | 1.648347 |
| 35 | 1 | 0 | 1.061097  | 1.072632 | 1.687443 |

**TS9**

|                        |                |
|------------------------|----------------|
| E (B3LYP)              | -1864.28644552 |
| Correction to Enthalpy | 0.415663       |
| E (M06-2X)             | -1863.82841688 |
| Frequency              | -1456.3531     |

Standard orientation:

| Center<br>Number | Atomic<br>Number | Atomic<br>Type | Coordinates (Angstroms) |           |           |
|------------------|------------------|----------------|-------------------------|-----------|-----------|
|                  |                  |                | X                       | Y         | Z         |
| 1                | 6                | 0              | 3.568028                | 0.381547  | -0.737328 |
| 2                | 1                | 0              | 3.410732                | 0.807603  | -1.728321 |
| 3                | 6                | 0              | 4.704396                | -0.626525 | -0.553335 |
| 4                | 1                | 0              | 5.215565                | -0.836799 | -1.494237 |
| 5                | 1                | 0              | 4.324196                | -1.577325 | -0.168362 |
| 6                | 6                | 0              | 5.616600                | 0.057646  | 0.487158  |
| 7                | 1                | 0              | 6.110630                | -0.652084 | 1.151997  |
| 8                | 1                | 0              | 6.383412                | 0.657090  | -0.009501 |
| 9                | 6                | 0              | 4.639824                | 0.967963  | 1.226825  |
| 10               | 1                | 0              | 5.087674                | 1.865294  | 1.652799  |
| 11               | 1                | 0              | 4.094147                | 0.431186  | 2.010445  |
| 12               | 1                | 0              | 2.438044                | -0.216076 | -0.534560 |

|    |    |   |           |           |           |
|----|----|---|-----------|-----------|-----------|
| 13 | 8  | 0 | 3.708101  | 1.399602  | 0.206646  |
| 14 | 6  | 0 | -2.289077 | 4.613926  | -0.672986 |
| 15 | 1  | 0 | -1.896124 | 5.788419  | 1.091274  |
| 16 | 1  | 0 | -2.535184 | 5.470795  | -1.290324 |
| 17 | 1  | 0 | -1.320348 | 3.809845  | 2.478535  |
| 18 | 1  | 0 | -1.387091 | 1.547615  | 1.504138  |
| 19 | 1  | 0 | -2.591697 | 3.204040  | -2.265818 |
| 20 | 1  | 0 | -1.987126 | 0.917836  | -2.154384 |
| 21 | 1  | 0 | -3.136219 | 0.458629  | -0.908340 |
| 22 | 1  | 0 | -3.636008 | -4.135318 | -1.262134 |
| 23 | 1  | 0 | -3.204836 | -1.571640 | -1.655612 |
| 24 | 1  | 0 | -1.792713 | -2.581069 | -1.859521 |
| 25 | 1  | 0 | -4.065878 | -4.443487 | 1.088493  |
| 26 | 1  | 0 | -2.250911 | -3.020944 | 2.382915  |
| 27 | 1  | 0 | -3.887403 | -2.431628 | 2.534478  |
| 28 | 1  | 0 | -3.549140 | -0.663403 | 0.941901  |
| 29 | 1  | 0 | -2.115432 | -0.650566 | 1.966730  |
| 30 | 1  | 0 | -0.927245 | -2.062813 | 0.299900  |
| 31 | 6  | 0 | -1.606190 | 3.681753  | 1.440291  |
| 32 | 6  | 0 | -1.647140 | 2.400690  | 0.889366  |
| 33 | 6  | 0 | -2.322726 | 3.333105  | -1.222153 |
| 34 | 6  | 0 | -1.929356 | 4.793116  | 0.662808  |
| 35 | 6  | 0 | -2.005860 | 2.211923  | -0.447810 |
| 36 | 6  | 0 | -2.125078 | 0.831888  | -1.073996 |
| 37 | 8  | 0 | 0.495611  | 0.921513  | -1.573115 |
| 38 | 17 | 0 | 1.365201  | -2.452828 | -1.180651 |
| 39 | 17 | 0 | 1.184512  | -1.138919 | 1.486690  |
| 40 | 6  | 0 | 1.205019  | -0.915726 | -0.286624 |
| 41 | 6  | 0 | 0.113961  | -0.000079 | -0.856144 |
| 42 | 7  | 0 | -1.197237 | -0.182687 | -0.542107 |
| 43 | 6  | 0 | -3.279044 | -3.398043 | -0.548095 |
| 44 | 6  | 0 | -1.766062 | -1.447932 | -0.015648 |
| 45 | 6  | 0 | -2.513257 | -2.228272 | -1.114161 |
| 46 | 6  | 0 | -3.524057 | -3.562994 | 0.753370  |

|    |   |   |           |           |          |
|----|---|---|-----------|-----------|----------|
| 47 | 6 | 0 | -3.080598 | -2.585264 | 1.810069 |
| 48 | 6 | 0 | -2.655251 | -1.232986 | 1.216950 |

-----

## References.

- 1.- (a) C. Lee, W. Yang and R. G. Parr, *Phys. Rev. B* 1988, **37**, 785–789; (b) A. D. Becke, *J. Chem. Phys.* 1993, **98**, 5648–5652; (c) W. Kohn, A. D. Becke and R. G. Parr, *J. Phys. Chem.* 1996, **100**, 12974–12980.
- 2.- Gaussian 09, Revision D.01; M. J. Frisch, G. W. Trucks, H. B. Schlegel, G. E. Scuseria, M. A. Robb, J. R. Cheeseman, G. Scalmani, V. Barone, B. Mennucci, G. A. Petersson, H. Nakatsuji, M. Caricato, X. Li, H. P. Hratchian, A. F. Izmaylov, J. Bloino, G. Zheng, J. L. Sonnenberg, M. Hada, M. Ehara, K. Toyota, R. Fukuda, J. Hasegawa, M. Ishida, T. Nakajima, Y. Honda, O. Kitao, H. Nakai, T. Vreven, J. A. Montgomery, Jr., J. E. Peralta, F. Ogliaro, M. Bearpark, J. J. Heyd, E. Brothers, K. N. Kudin, V. N. Staroverov, T. Keith, R. Kobayashi, J. Normand, K. Raghavachari, A. Rendell, J. C. Burant, S. S. Iyengar, J. Tomasi, M. Cossi, N. Rega, J. M. Millam, M. Klene, J. E. Knox, J. B. Cross, V. Bakken, C. Adamo, J. Jaramillo, R. Gomperts, R. E. Stratmann, O. Yazyev, A. J. Austin, R. Cammi, C. Pomelli, J. W. Ochterski, R. L. Martin, K. Morokuma, V. G. Zakrzewski, G. A. Voth, P. Salvador, J. J. Dannenberg, S. Dapprich, A. D. Daniels, O. Farkas, J. B. Foresman, J. V. Ortiz, J. Cioslowski and D. J. Fox, Gaussian, Inc., Wallingford CT, 2013.
- 3.- C. Gonzalez and H. B. Schlegel, *J. Phys. Chem.* 1990, **94**, 5523–5527.
- 4.- T. Sato, H. Matsuoka, T. Igarashi, M. Minomura and E. Murayama, *J. Org. Chem.* 1988, **53**, 1207-1212.
- 5.- M. Pattarozzi, F. Roncaglia, L. Accorsi, A. F. Parsons and F. Ghelfi, *Tetrahedron* 2010, **66**, 1357-1364.
- 6.- F. Diaba, A. Martínez-Laporta and J. Bonjoch, *Eur. J. Org. Chem.* 2014, 2371-2378.

- 7.- B. Schmidt, S. Hauke and N. Mühlberg, *Synthesis* 2014, **46**, 1648–1658.
- 8.- O.-Y. Lee, K. -L. Law and D. Yang, *Org. Lett.* 2009, **11**, 3302-3305.
- 9.- G.-Q. Liu, Z.-Y. Ding, L. Zhang, T. -T. Li, L. Li, L. Duan and Y. -M. Li, *Adv. Synth. Catal.* 2014, **356**, 2303–2310.
- 10.- Synthesized by reductive amination ( $\text{BnNH}_2$ ,  $\text{NaBH}(\text{OAc})_3$ ) from 4-methylcyclohex-3-enone.
- 11.- E. Y. Shinkevich, K. A. Tehrani, A. F. Khlebnikov and M. S. Novikov, *Tetrahedron* 2008, **64**, 7524-7530.
- 12.- T. -Y. Lin. C. A. Kingsbury and N. H. Cromwell, *J. Heterocycl. Chem.* 1984, **21**, 1871-1875.
- 13.- M. Mori, N. Kanda, I. Oda and Y. Ban, *Tetrahedron* 1985, **41**, 5465-5474.
- 14.- (a) J. Quirante, C. Escolano, F. Diaba and J. Bonjoch, *Heterocycles* 1999, **50**, 731-738; (b) J. Quirante, C. Escolano, F. Diaba, M. Torra and J. Bonjoch, *Magn. Reson. Chem.* 2000, **38**, 891–893.

## SPECTRA FOR NEW AND DESCRIBED COMPOUNDS

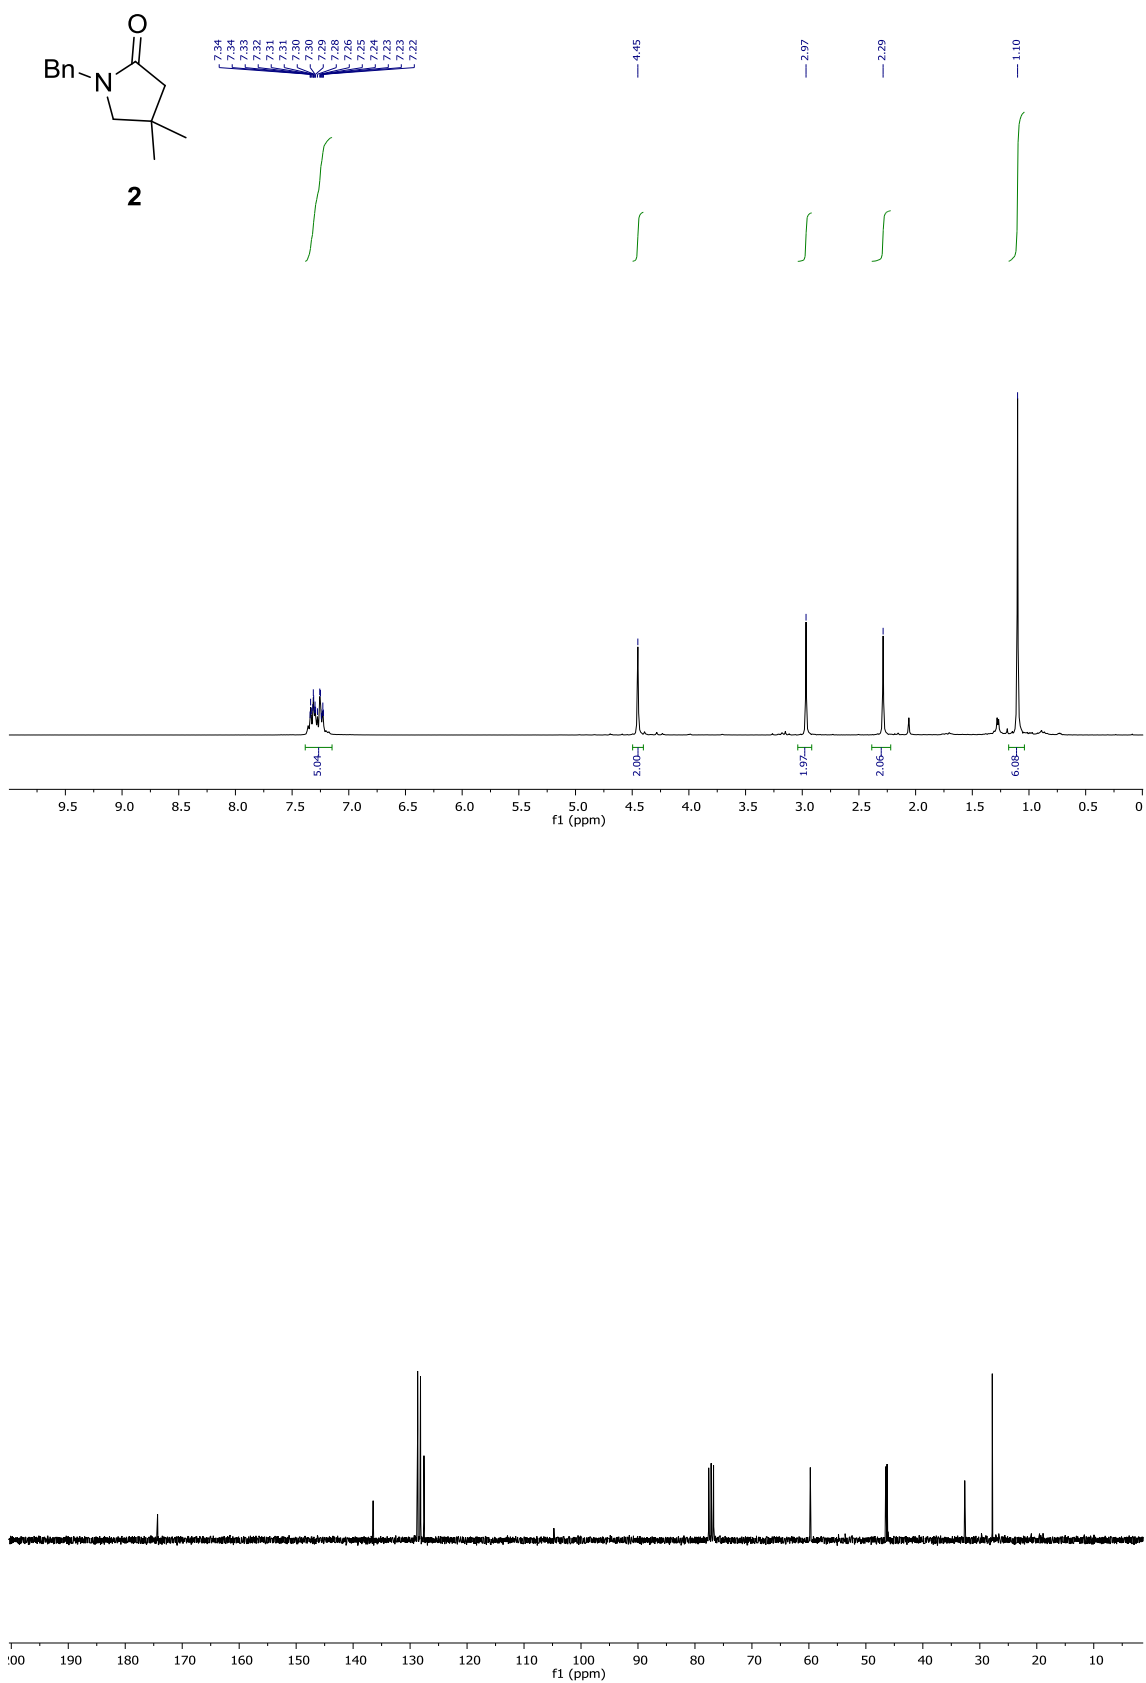

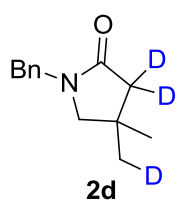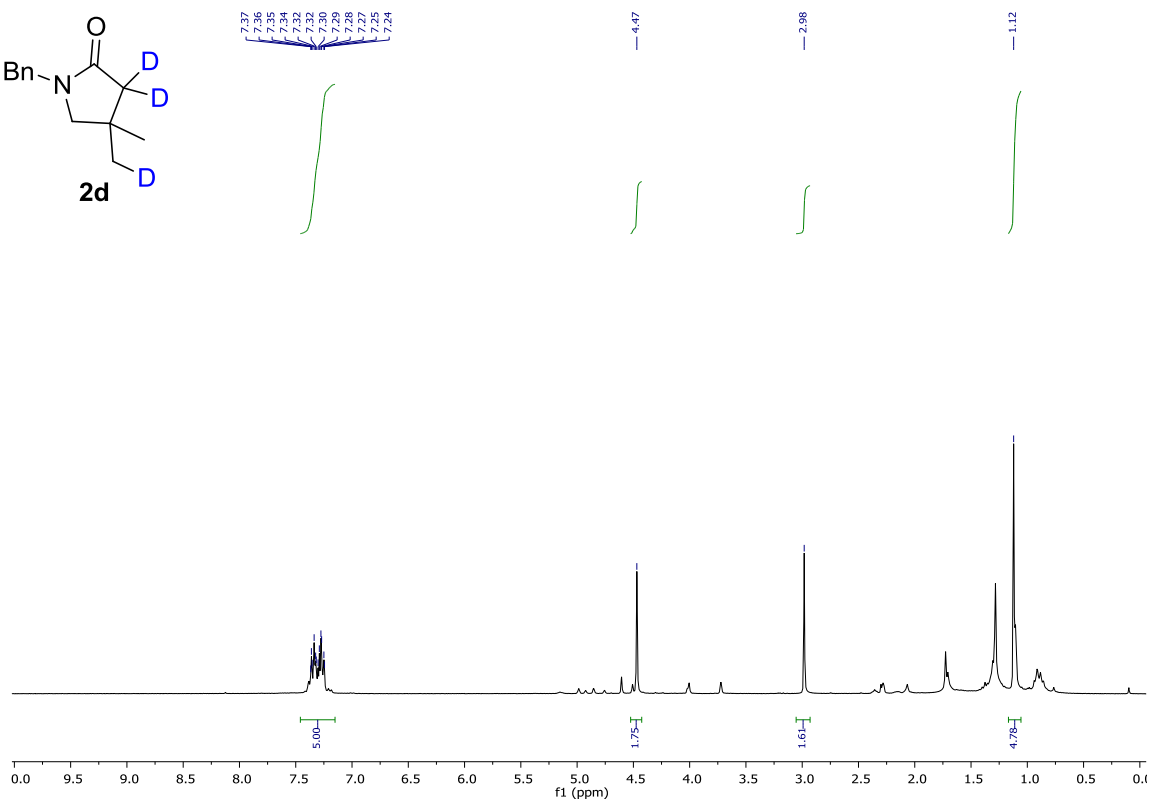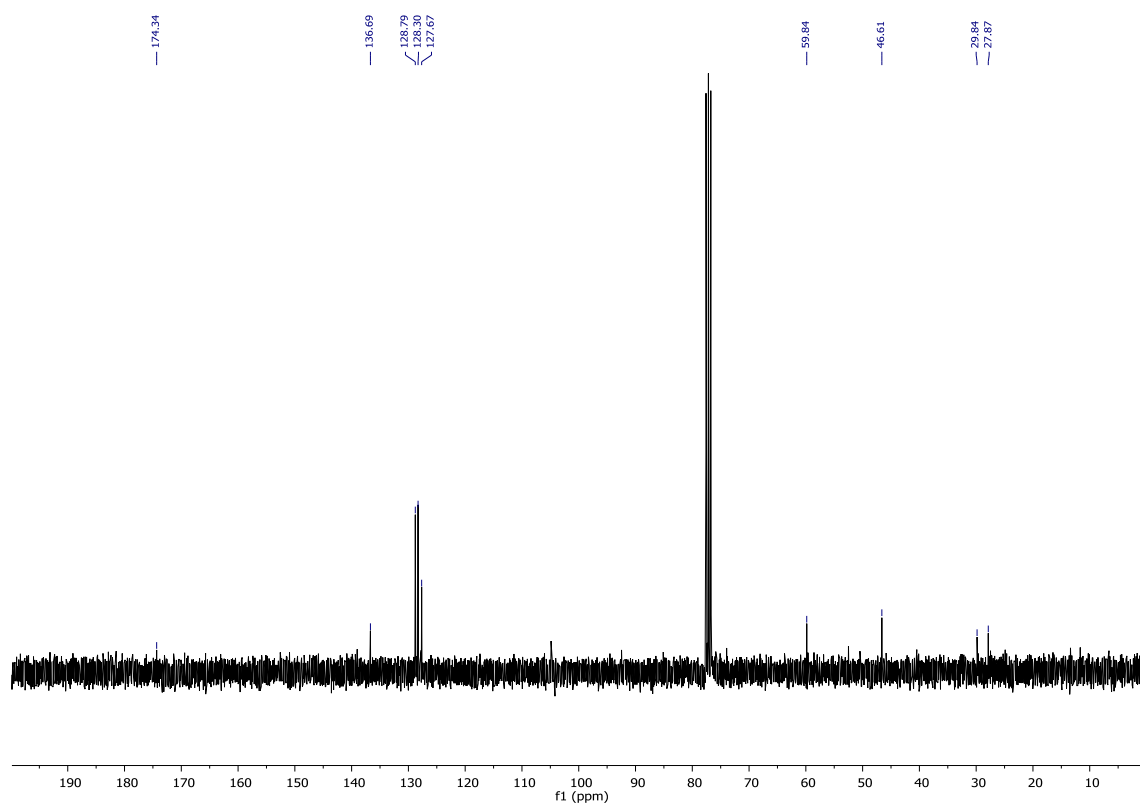

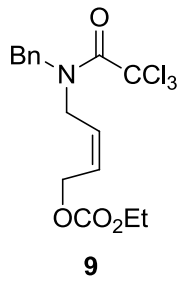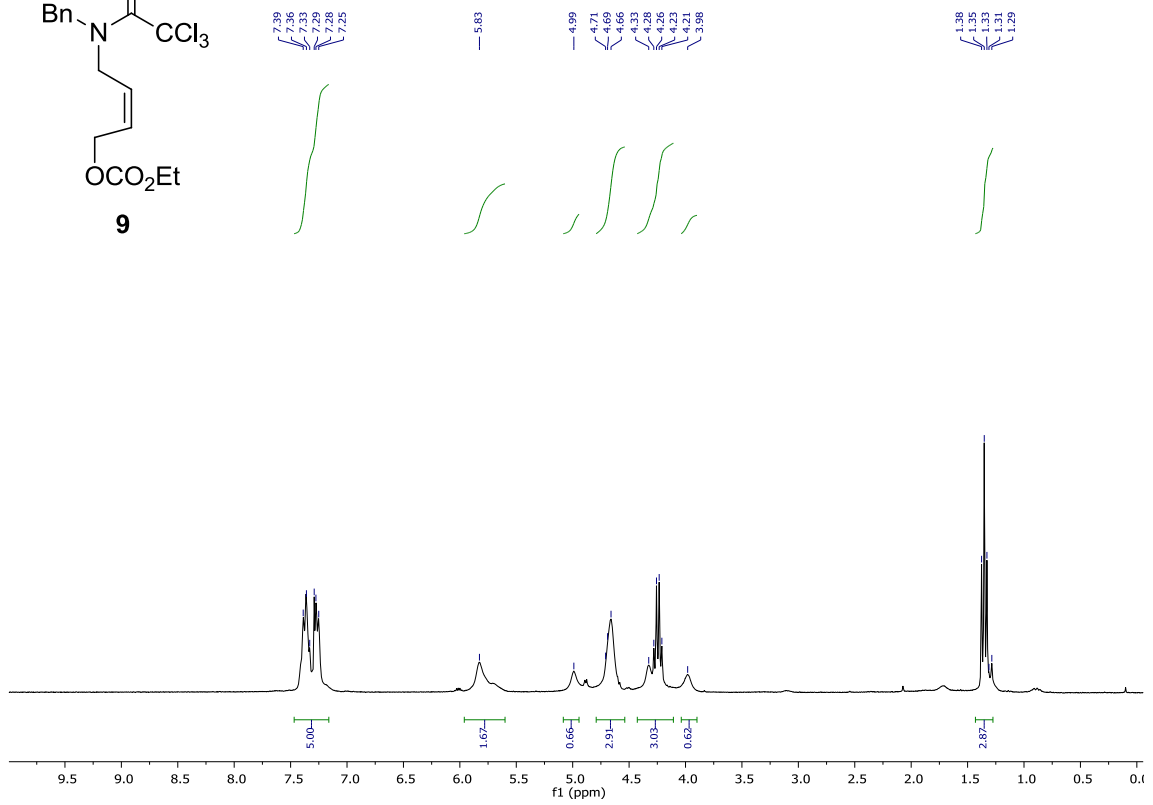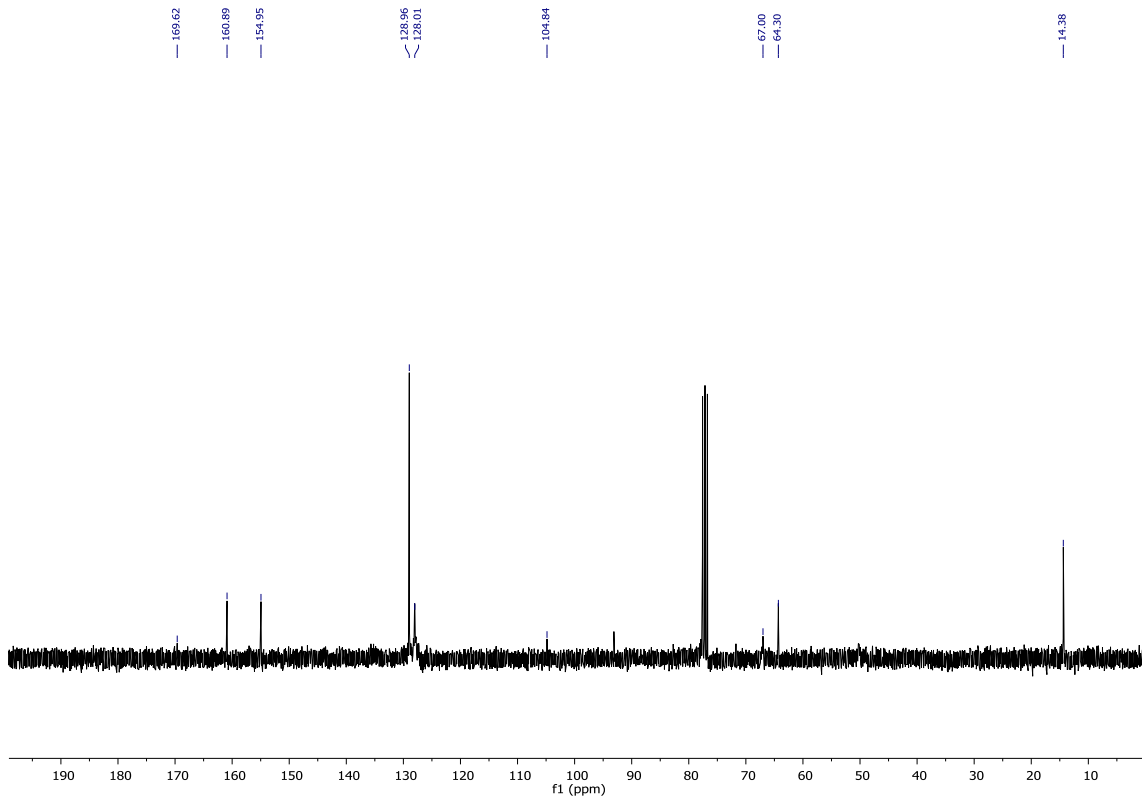



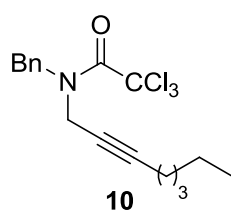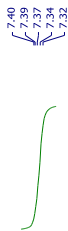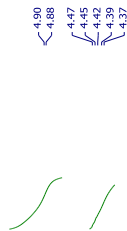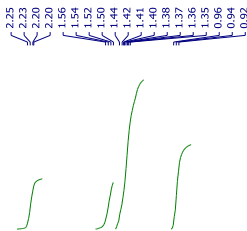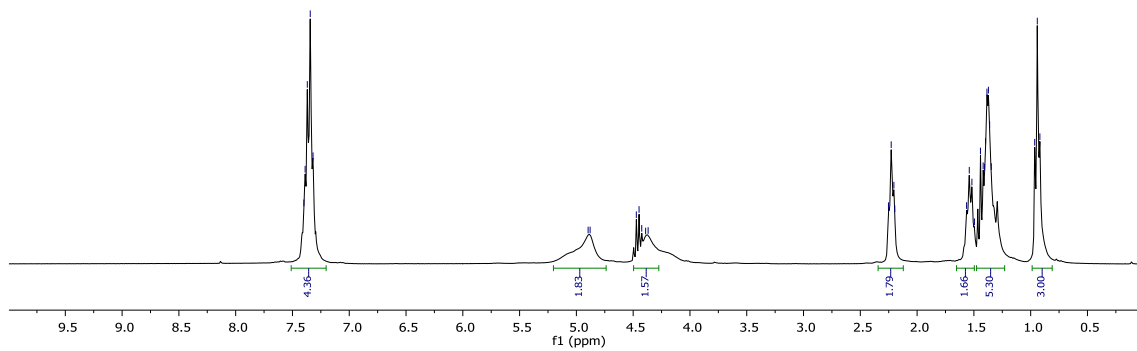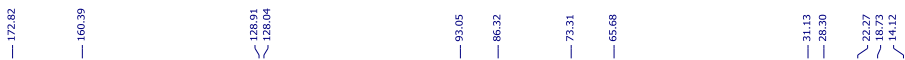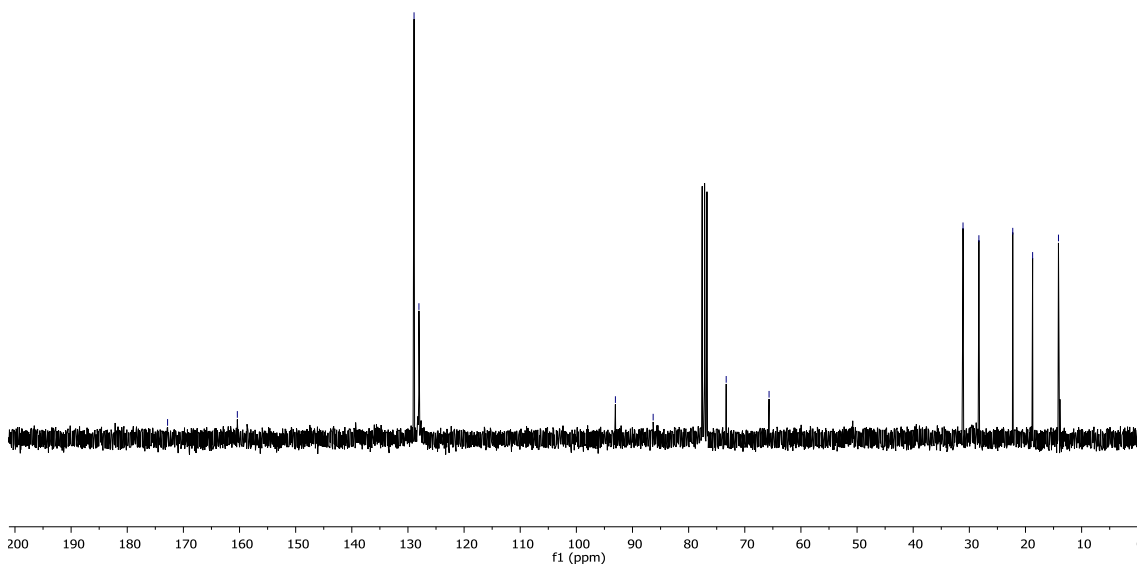

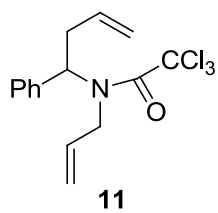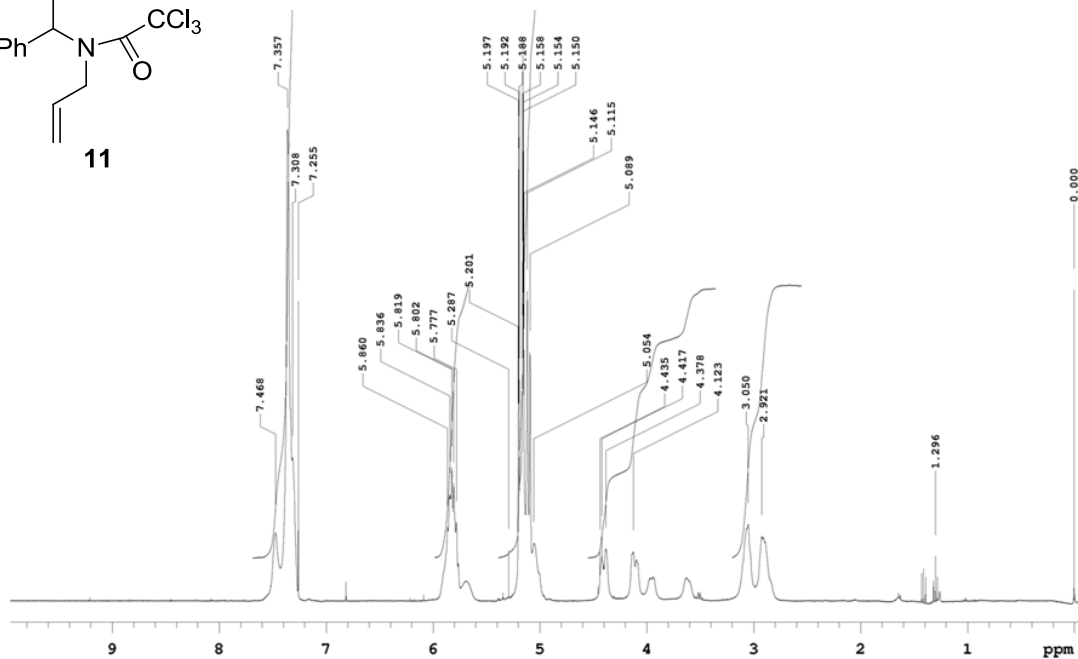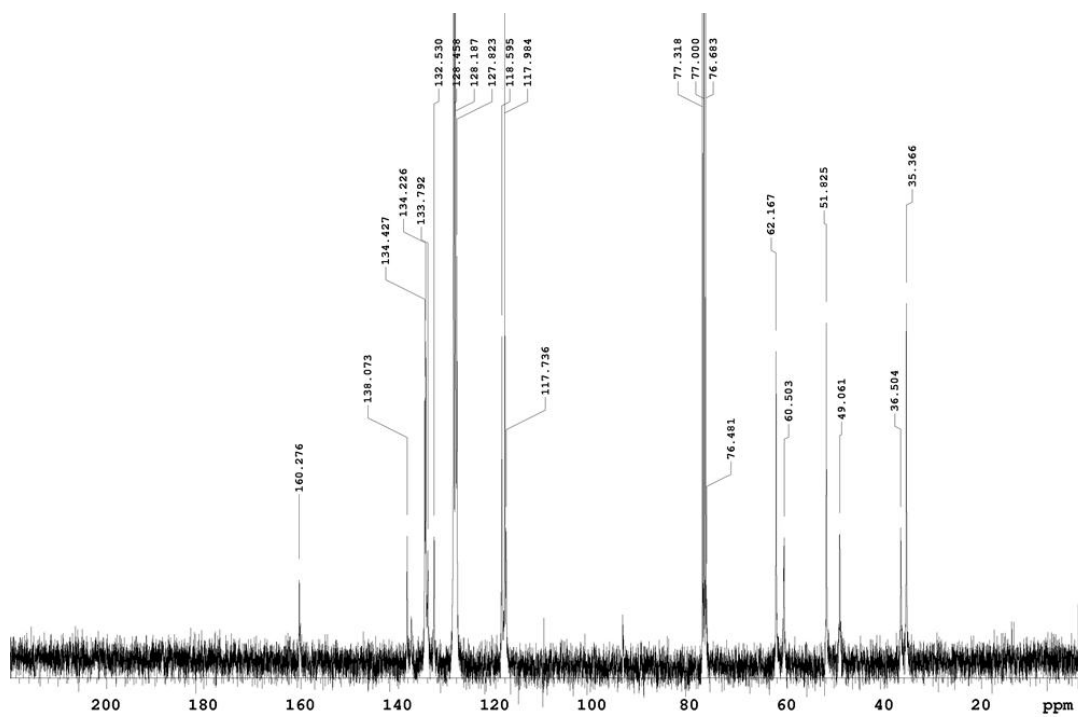

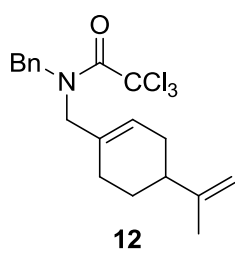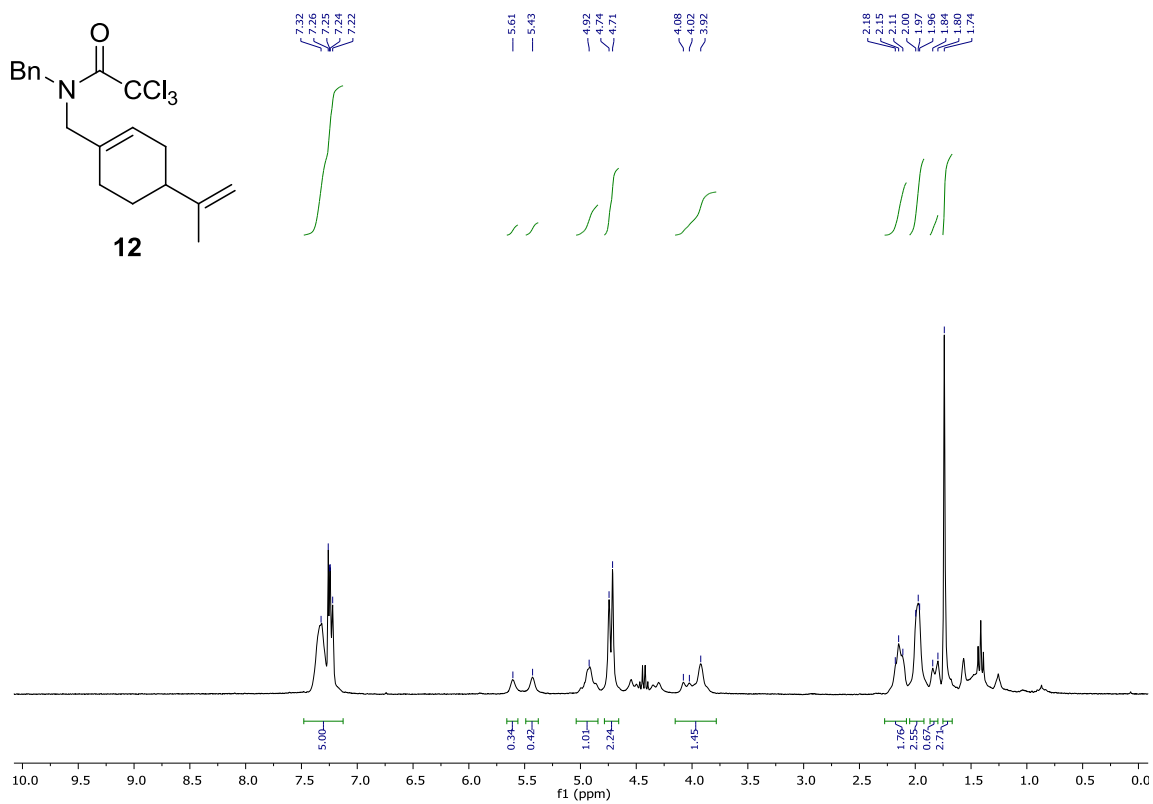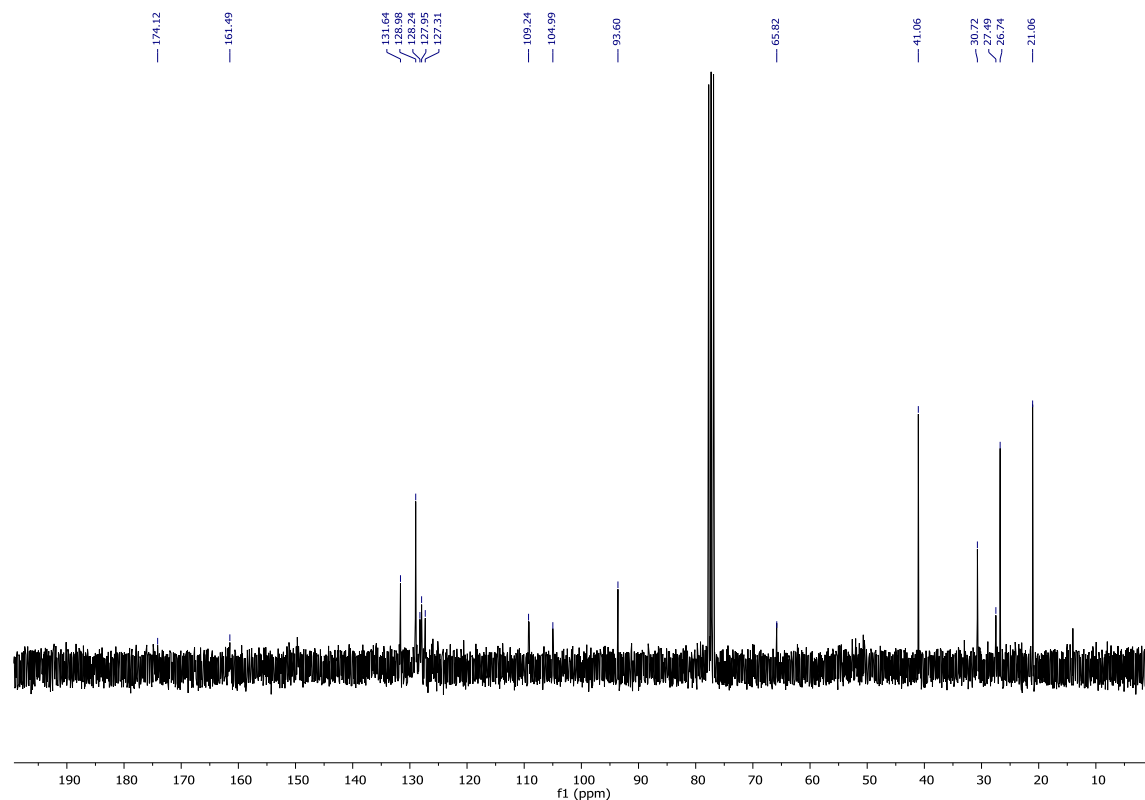

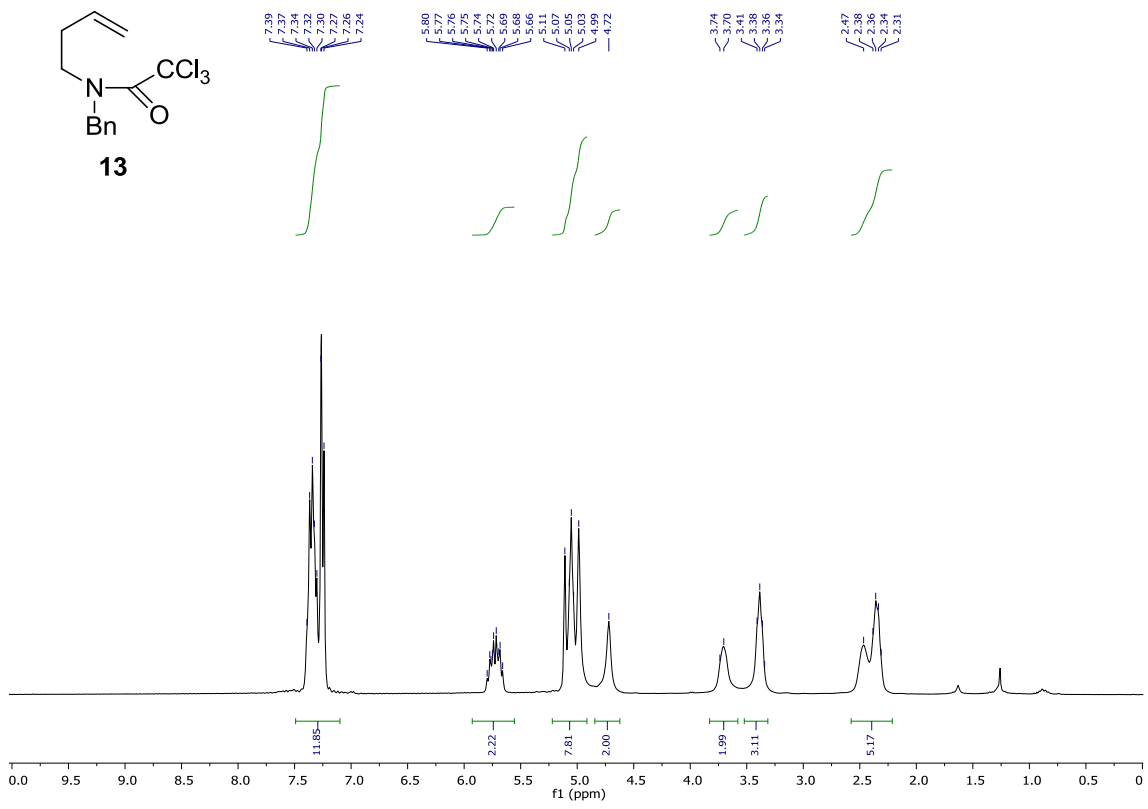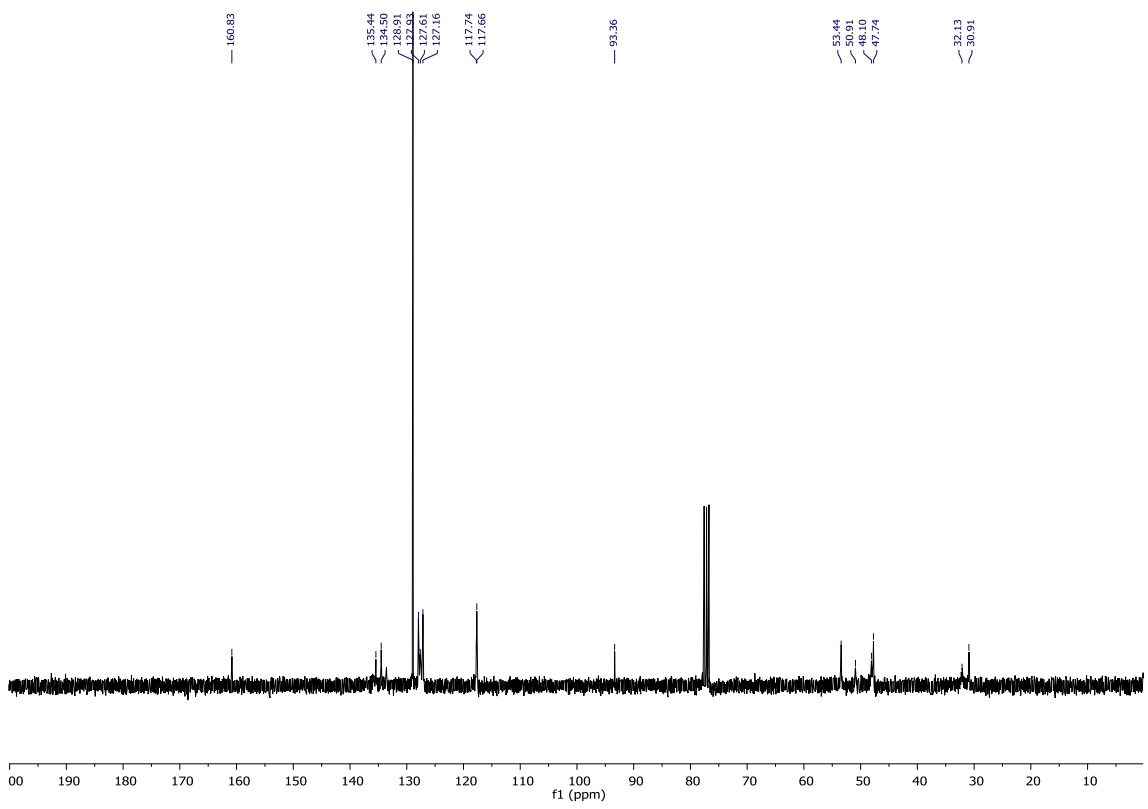

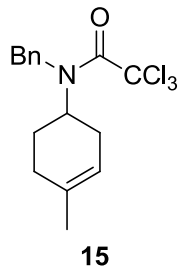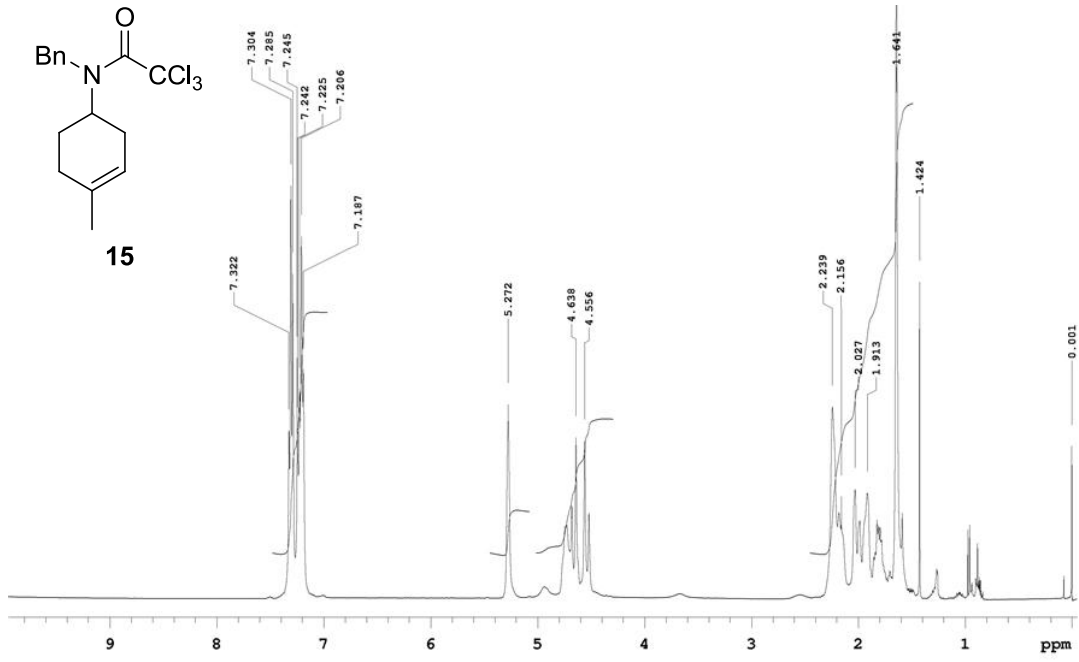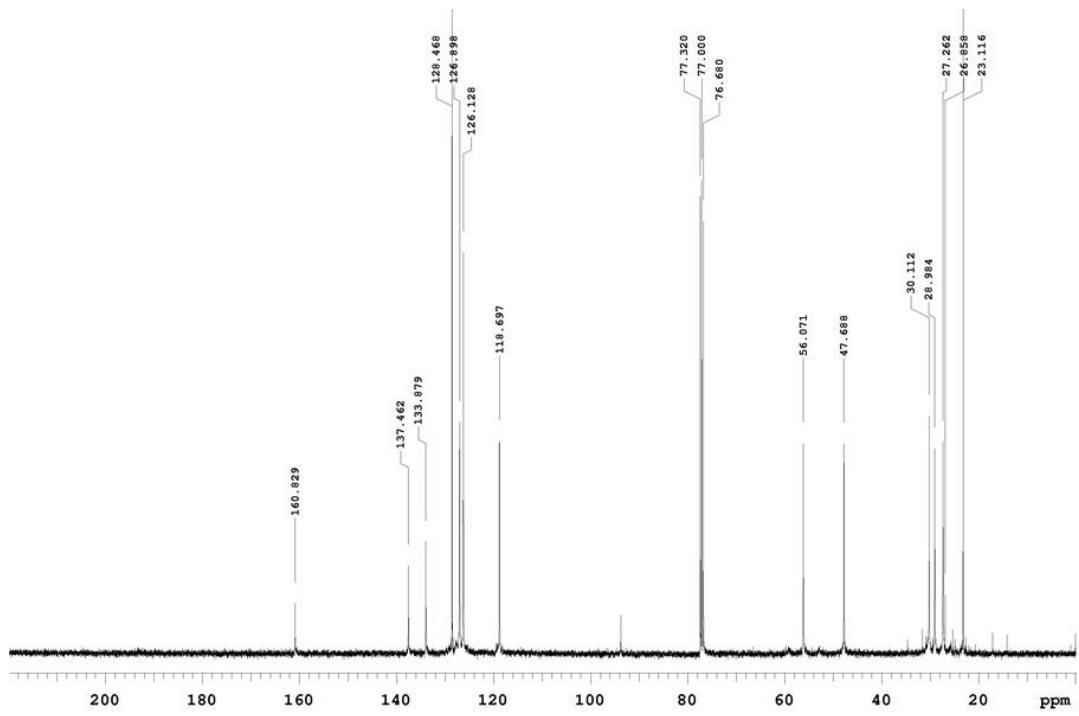

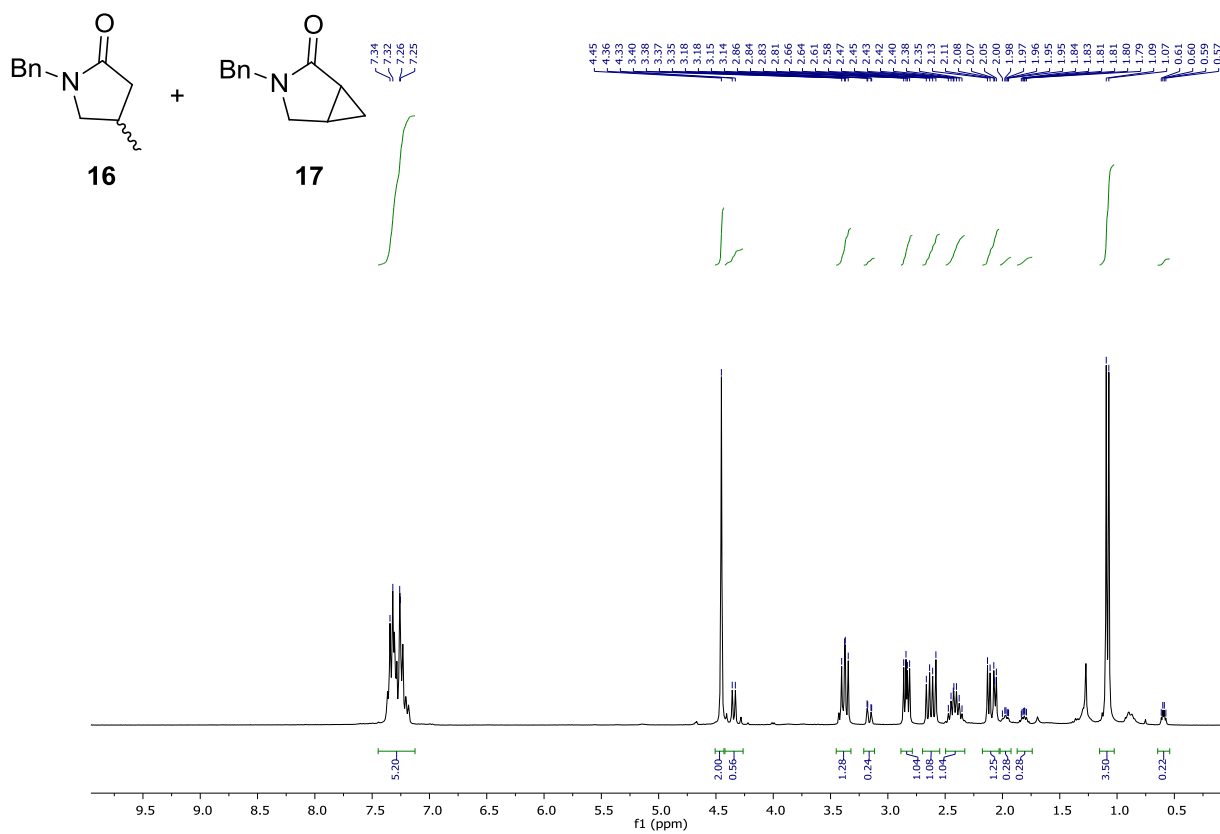

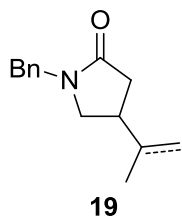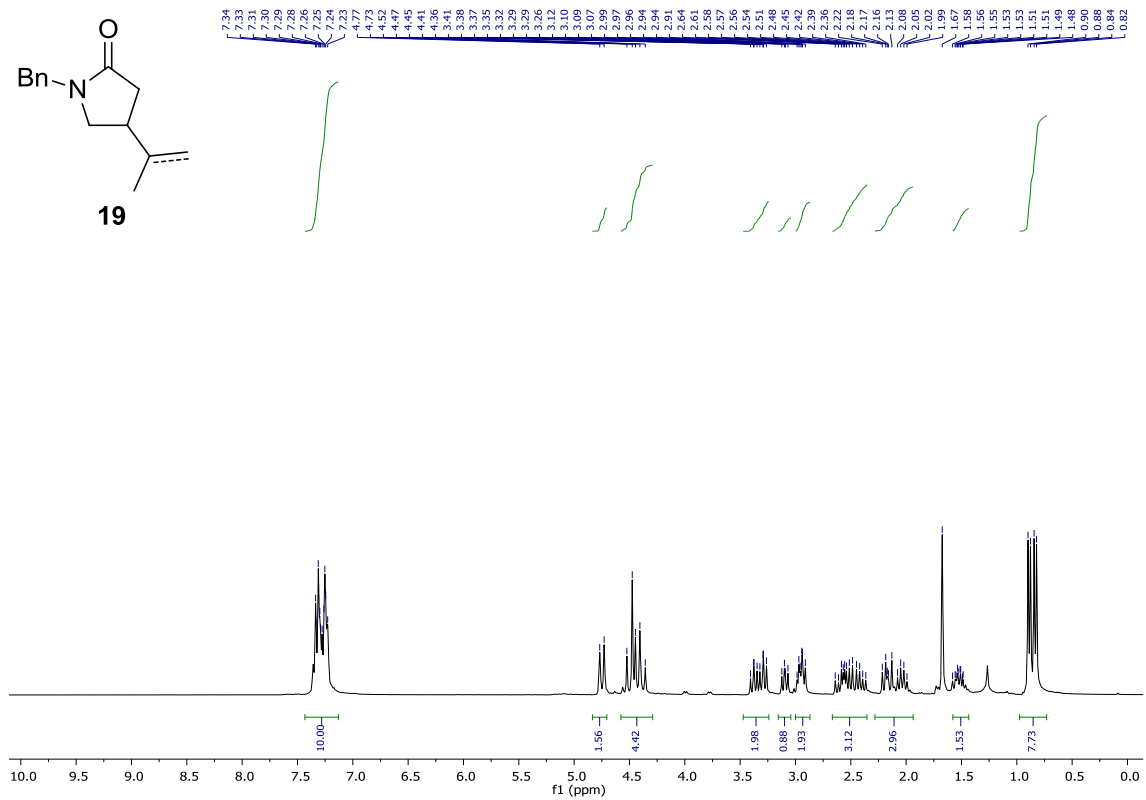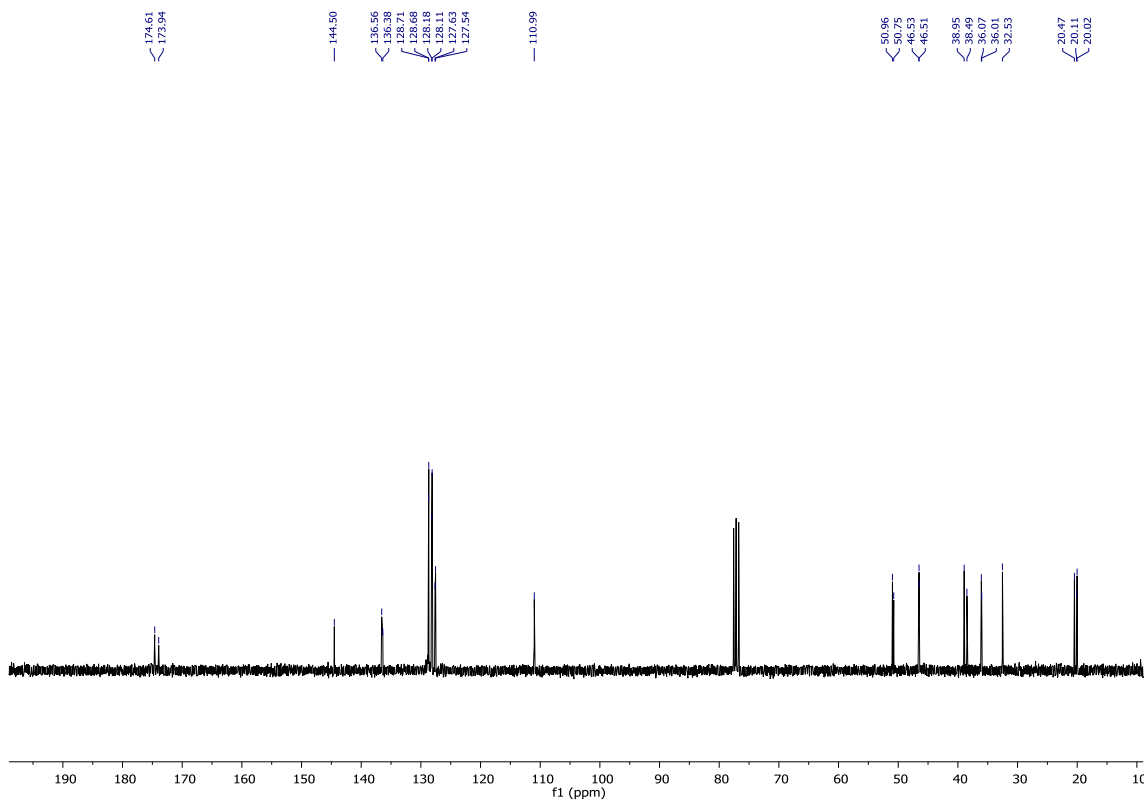

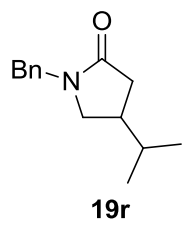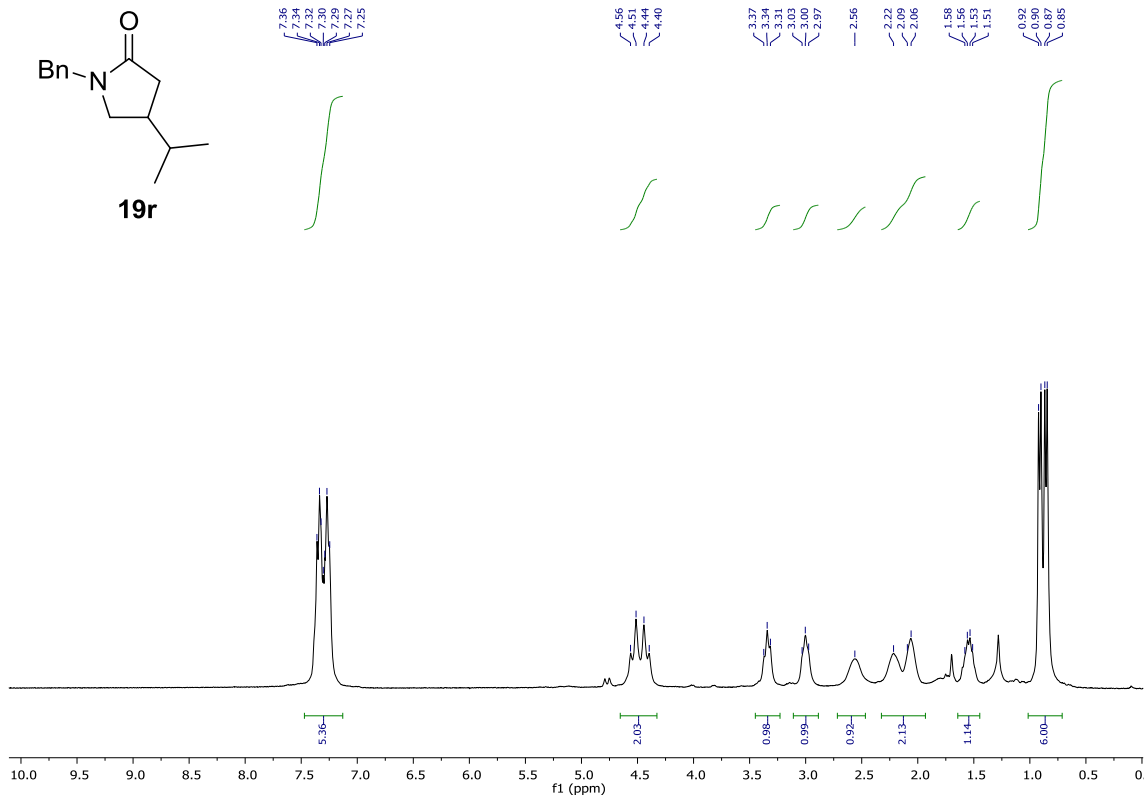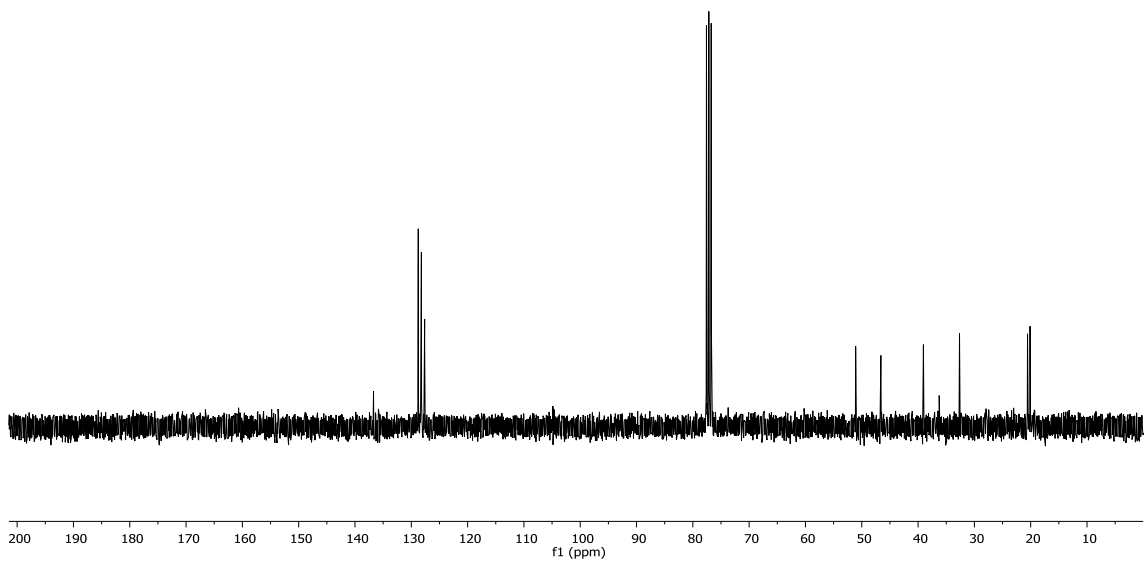



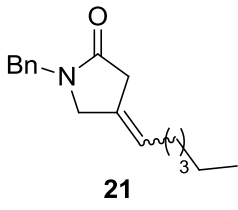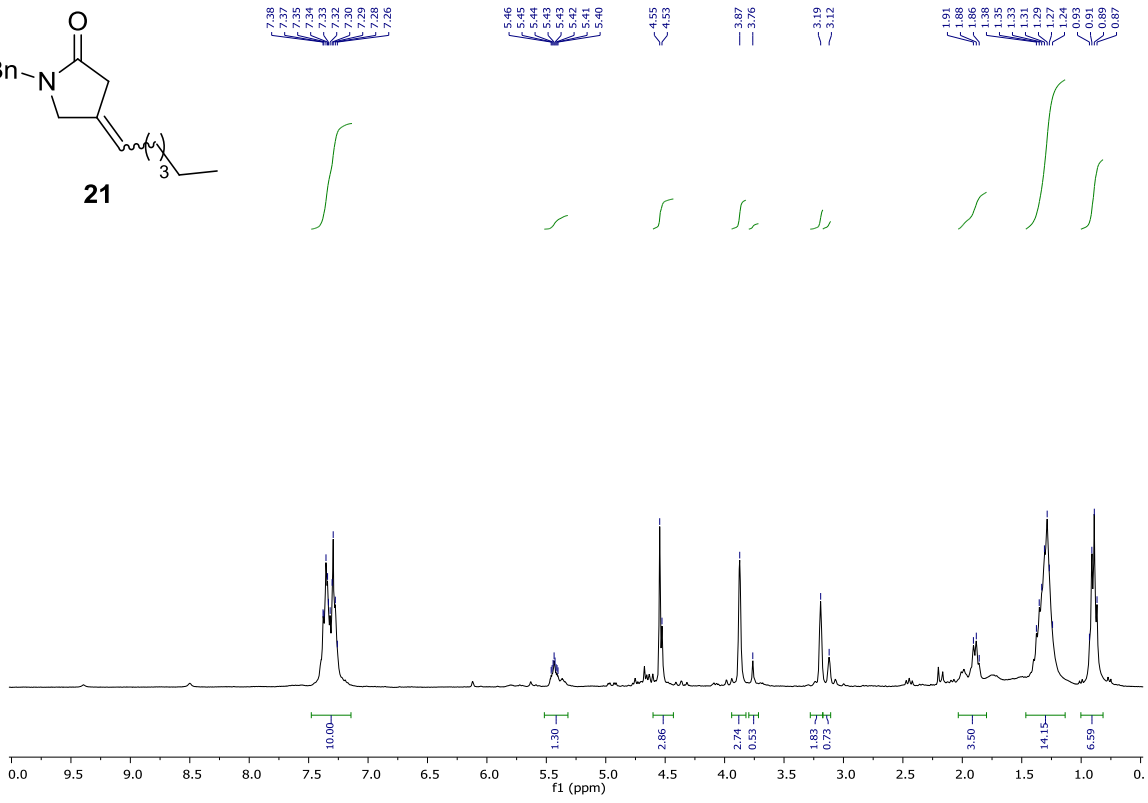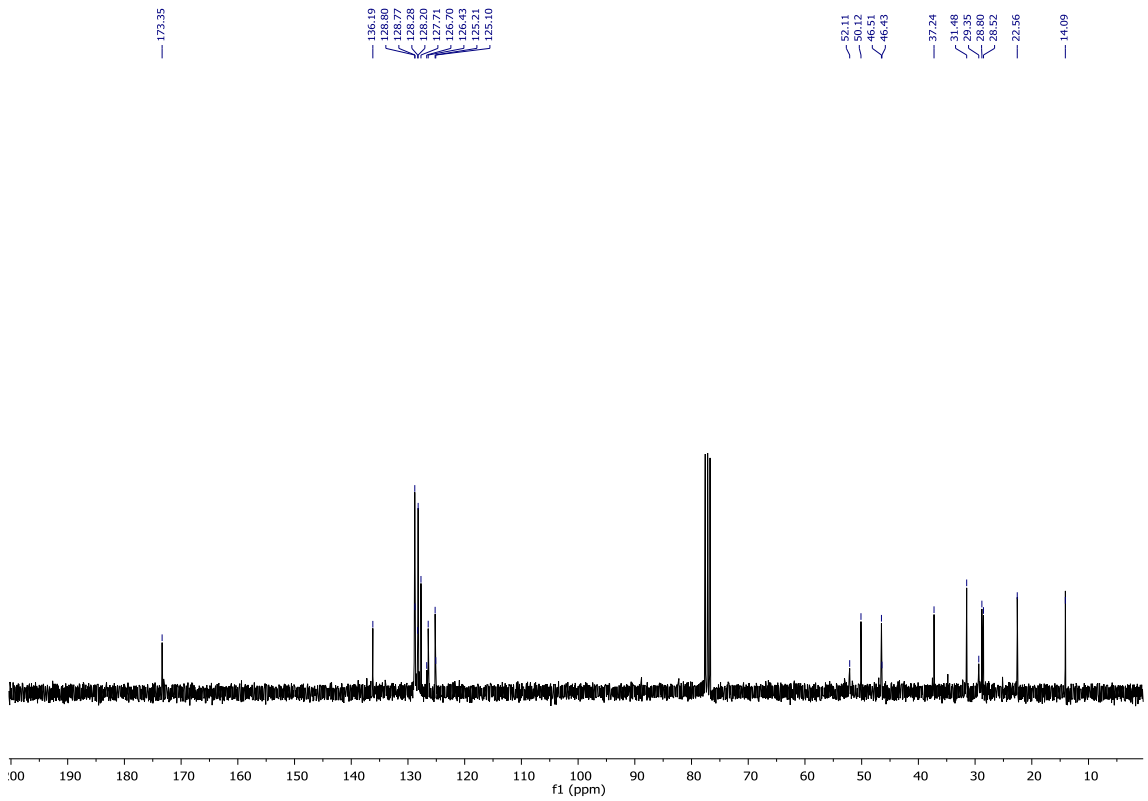

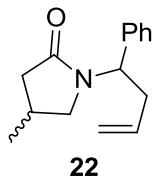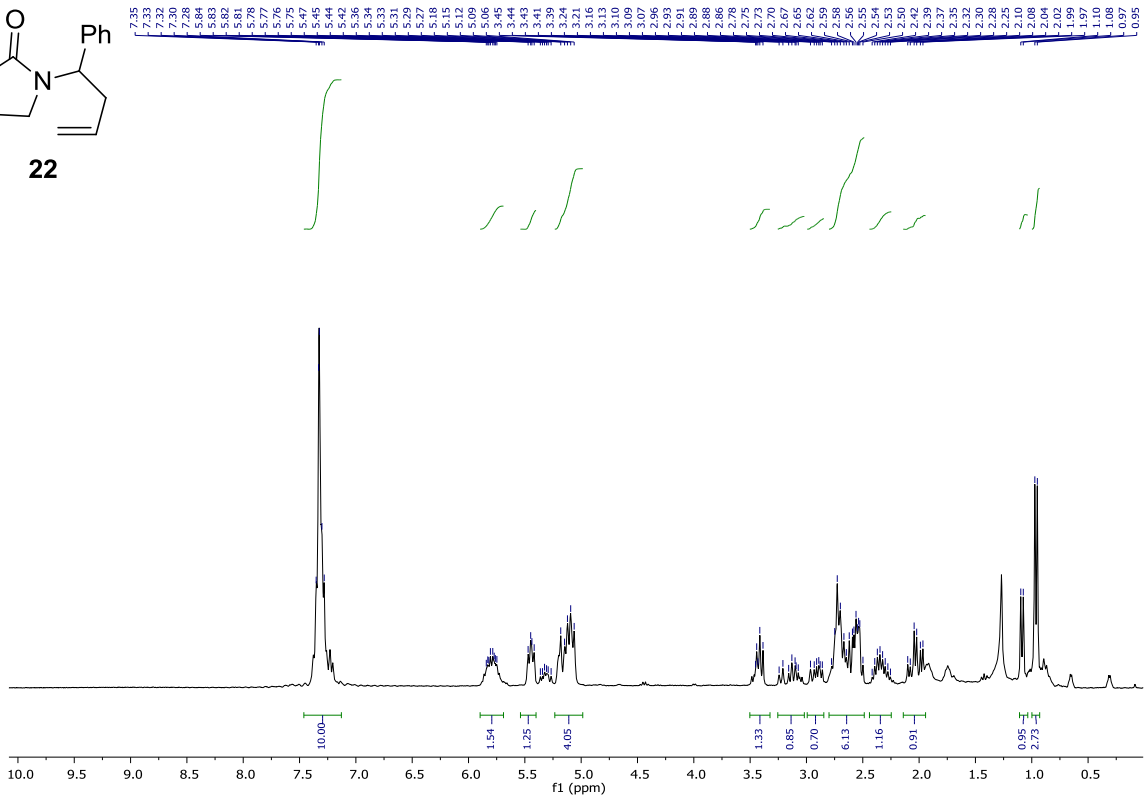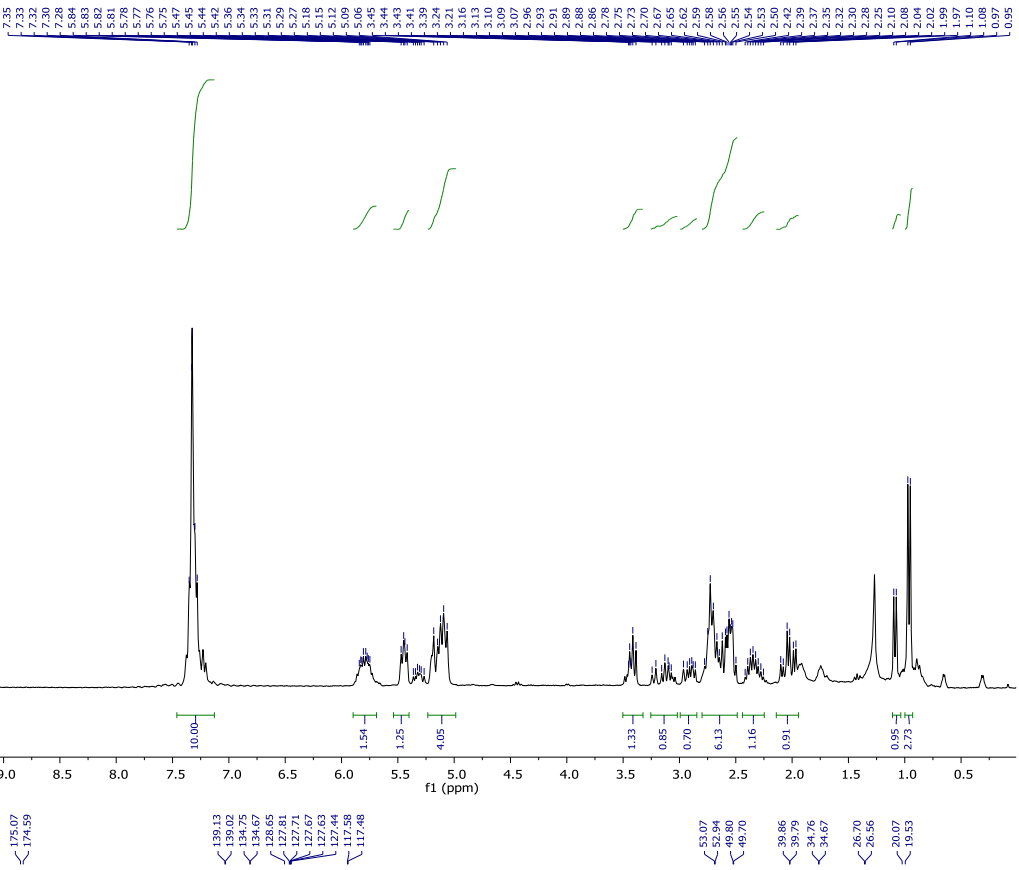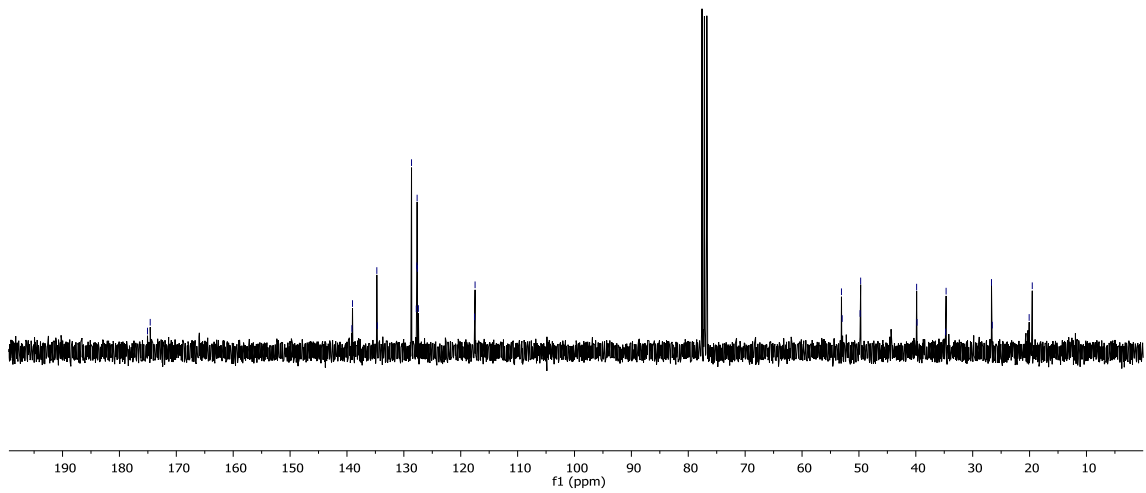

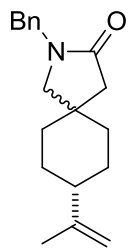

23 (major isomer)

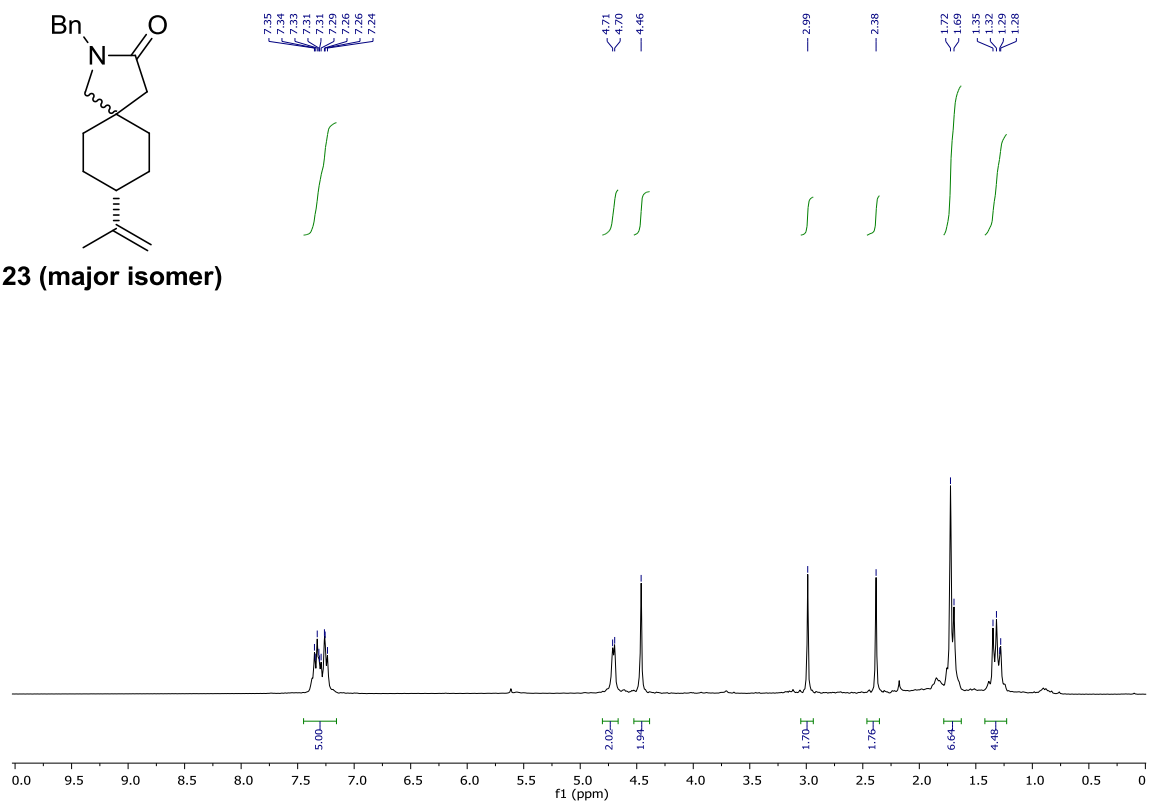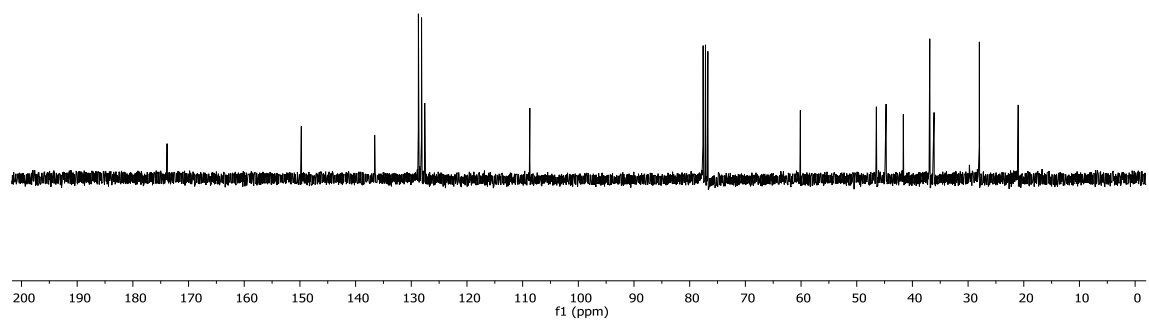

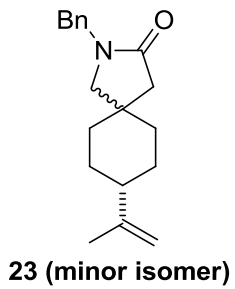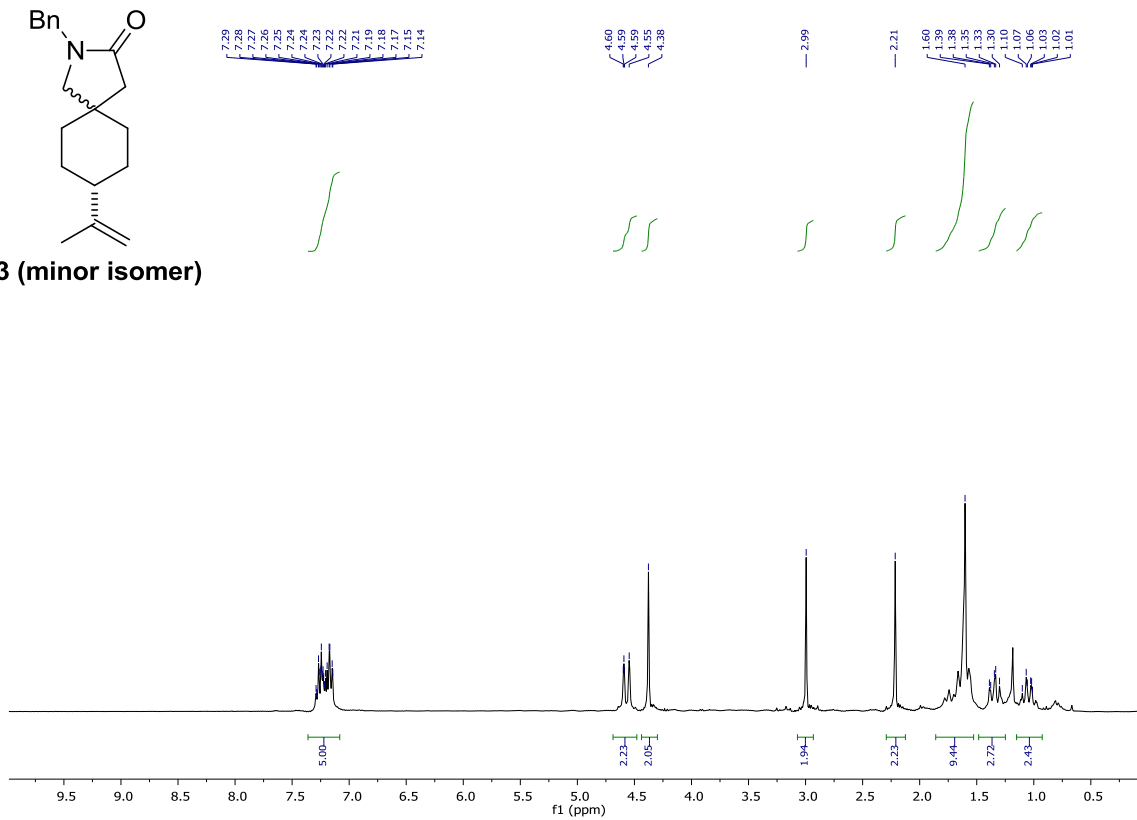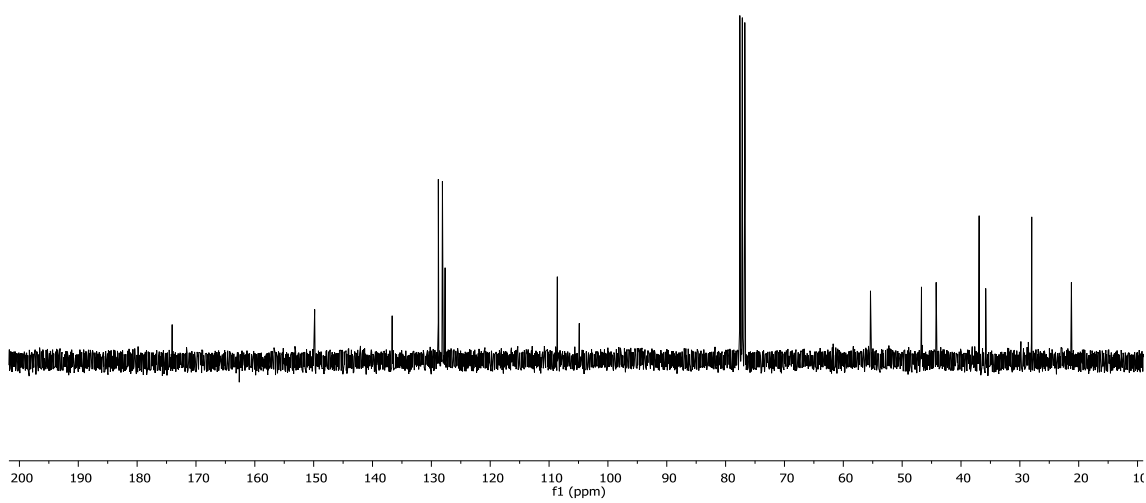

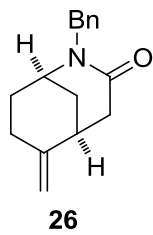

+

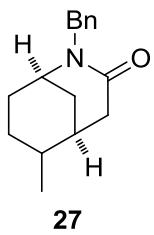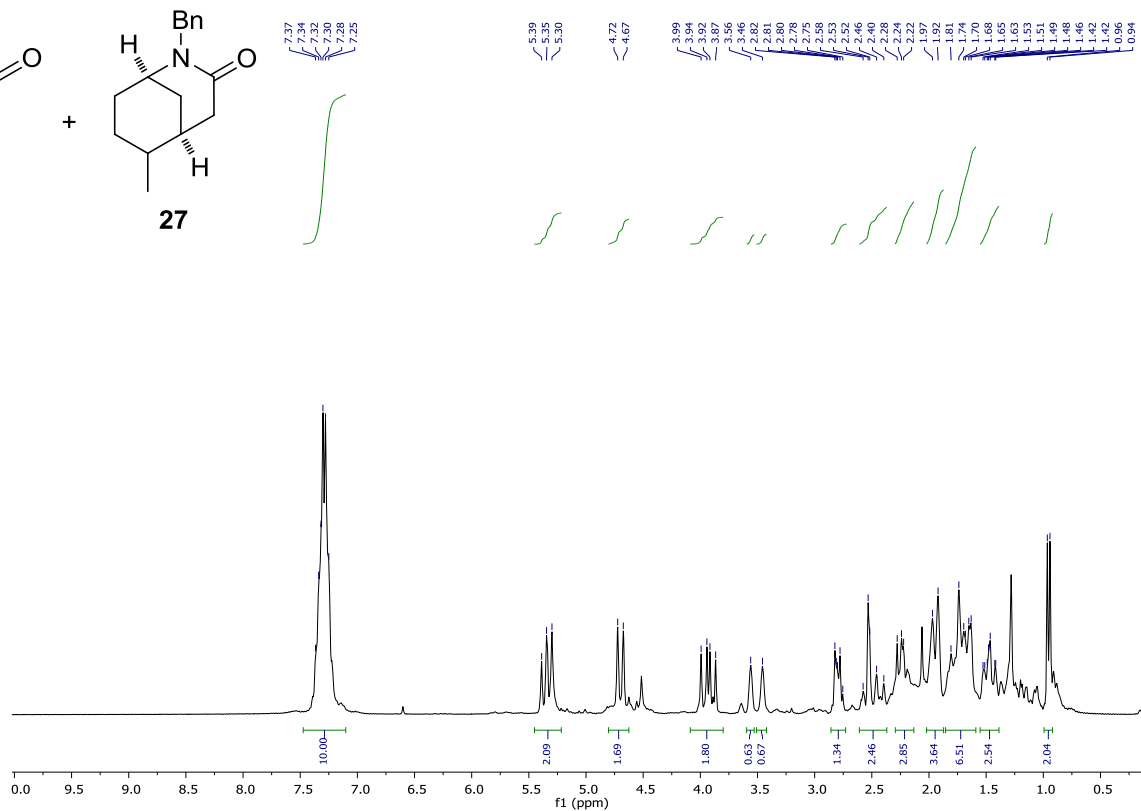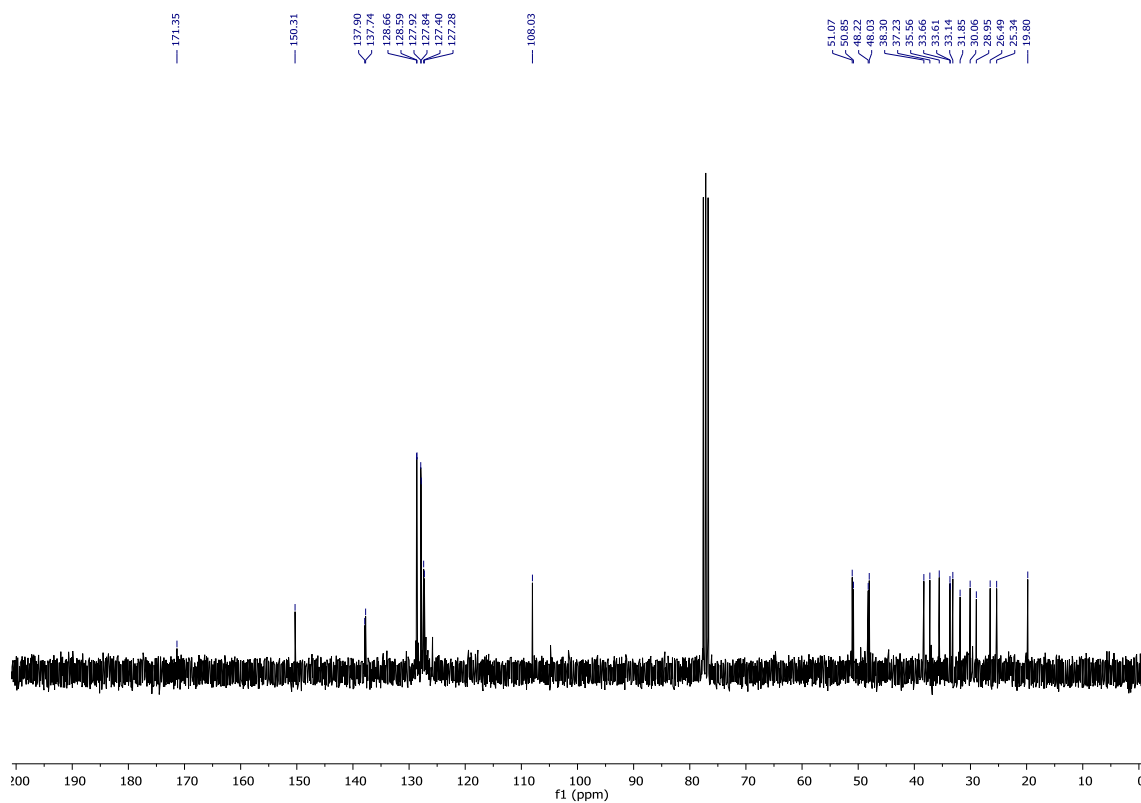

Supplement: c6ra12180b1.pdf [file c6ra12180b1.pdf]
